# Supplementary material
Source: PubMed Central journal article supplement (PMC4909573)
Supplement: NIHMS776861-supplement-3.pdf [file NIHMS776861-supplement-3.pdf]

Manuscript Number: IJPara15\_SI04R1

Title: Independent origins of loss-of-function mutations conferring oxamniquine resistance in a Brazilian schistosome population

Article Type: Invited Paper

Keywords: Schistosoma mansoni, Oxamniquine resistance, Sulfotransferase, Loss-of-function, Biochemical assay, Soft selective event

Corresponding Author: Dr T Anderson,

Corresponding Author's Institution:

First Author: Frédéric D Chevalier, PhD

Order of Authors: Frédéric D Chevalier, PhD; Winka Le Clec'h, PhD; Nina Eng; Anastasia R Rugel; Rafael Ramiro de Assis, PhD; Guilherme Oliveira, PhD; Stephen P Holloway, PhD; Xiaohang Cao, MD; P. John Hart, PhD; Philip T LoVerde, PhD; T Anderson

Manuscript Region of Origin: AFGHANISTAN

Abstract: Molecular surveillance provides a powerful approach to monitoring the resistance status of parasite populations in the field and for understanding resistance evolution. Oxamniquine (OXA) was used to treat Brazilian schistosomiasis patients (mid-1970s to mid-2000s) and several cases of parasite infections resistant to treatment were recorded. The gene underlying resistance (SmSULT-OR) encodes a sulfotransferase required for intracellular drug activation. Resistance has a recessive basis and occurs when both SmSULT-OR alleles encode for defective proteins. Here we examine SmSULT-OR sequence variation in a natural schistosome population in Brazil ~40 years after the first use of this drug. We sequenced SmSULT-OR from 189 individual miracidia (1-11 per patient) recovered from 49 patients, and tested proteins expressed from putative resistance alleles for their ability to activate OXA. We found nine mutations (four non-synonymous single nucleotide polymorphisms (SNPs), three non-coding SNPs and two indels). Both mutations (p.E142del and p.C35R) identified previously were recovered in this field population. We also found two additional mutations (a splice site variant and 1 bp coding insertion) predicted to encode non-functional truncated proteins. Two additional substitutions (p.G206V, p.N215Y) tested had no impact on OXA activation. Three results are of particular interest: (i) we recovered the p.E142del mutation from the field: this same deletion is responsible for resistance in an OXA-selected laboratory parasite population; (ii) frequencies of resistance alleles are extremely low (0.27-0.8%), perhaps due to fitness costs associated with carriage of these alleles; (iii) that four independent resistant alleles were found is consistent with the idea that multiple mutations can generate loss-of-function alleles.



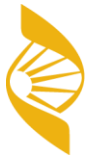

TEXAS BIOMEDICAL  
RESEARCH INSTITUTE

Department of genetics

Frédéric D. Chevalier, Ph.D.

March 30<sup>th</sup>, 2016

To the editor,

We are resubmitting our paper entitled **Independent origins of loss-of-function mutations conferring oxamniquine resistance in a Brazilian schistosome population** to the special Symposium for International Research and Innovations in Schistosomiasis (SIRIS) 2016 issue in International Journal for Parasitology as a research article. We thank the reviewers for their helpful comments on our manuscript. We have revised it in the light of these comments.

Please find below our answers to the reviewers' comments. The reviewers' comments are shown in italic, our responses are shown in plain blue text, while changes to the manuscript are shown in tracking mode in the revised manuscript. Line numbers indicated in the answers refer to the tracking mode version of the manuscript.

We think that the revised manuscript is now improved and hope that it will now be suitable for publication in International Journal for Parasitology.

We look forward to hearing from you,

Yours sincerely,

Frédéric D. Chevalier, Ph.D.

*Mail:* P.O. Box 760549, San Antonio, TX 78245-0549  
*Shipping:* 7620 NW Loop 410, San Antonio, TX 78227-5301  
*Telephone:* 210-258-9400

*Website:* [www.TxBiomed.org](http://www.TxBiomed.org)  
*Email:* [fcheval@TxBiomed.org](mailto:fcheval@TxBiomed.org)  
*FAX:* 210-670-3301

**Reviewer #1:**

*The article describes a systematic analysis of field-isolated schistosome miracidia for the presence of mutations in the gene encoding the sulfotransferase necessary for the activation of the schistosomicidal drug oxamniquine. In addition, the effect of mutations detected within exon sequences was tested by determining the capacity of the corresponding recombinant enzyme to activate oxamniquine in vitro. The article addresses and answers some important questions about the frequency of resistance mutations in a human population no longer exposed to oxamniquine and the capacity for the evolution of resistance in the event of the deployment of oxamniquine or new derivatives currently under development. Overall, the paper is well presented, the methodology is solid and the results obtained are significant. I have no major criticisms concerning the study and my only remarks concern a few points meriting explanation and some textual errors.*

*Remarks*

1. L.101: *Was the emergence of resistance due to oxamniquine due to the fact that it has the same target as hycanthone, or rather that the resistance mechanism is the same?*

Both the drug target and the mechanisms of resistance are the same for OXA and hycanthone. To clarify this sentence now reads: "This rapid emergence of resistance was most likely due to the previous treatment of the same populations with the related drug hycanthone (Katz1968, Coura2010), as both OXA and hycanthone have the same target (Jansma1977,Pica-Mattoccia1993) and the same mechanism of resistance (Pica-Mattoccia1992b)." (line 102)

2. L.166: *Taq polymerase, used for exon amplification, can introduce random errors in the amplified sequence. How were these detected and distinguished from SNPs, some of which occurred only once in the analyzed sequences?*

This is a concern only when cloned PCR products are sequenced. In this particular case, individual sequences generated during PCR are sequenced and these sequences may contain errors introduced by the enzyme. In our experiment, we used direct sequencing of PCR products to avoid this problem. Errors introduced by Taq polymerase are not an issue with direct sequencing, because PCR products are generated from multiple independent template sequences.

3. L.199: *I assume that the accession numbers will be completed in proof.*

The accession number are now included in the text (line 203).

4. L.298: *"High frequency" SNPs present in 96% of the analyzed sequences seem rather more like a sequence change in the Brazilian strain compared to the strain used for the original genomic sequencing. Are these strictly "SNPs"?*

All nucleotide sites that are variable in the Brazilian population examined are SNPs and are detailed here. We now show the ancestral state at these non-coding SNP sites in Table 2.

5. *Suppl. Movie: The version I downloaded (twice!) was viewable but the lower half of the image trembled a great deal, notably when text was included. The authors should check this and upload a new version.*

We thank the reviewer for pointing this problem out. Indeed, the movie cannot be seen properly on Windows Media Player which we did not previously test. We modified the encoding parameters and tested the movie on several players.

#### *Textual errors*

*Only a corrected version of the text is given below. Some "corrections" may be considered by the authors to be stylistic whims of the reviewer. I make the suggestions nevertheless.*

1. L.58: *"Four independent ..."*

Done

2. L.83: *"only possible when resistance..."*

Done

3. L.101: *"Later genetic studies..."*

Done

4. L:111: *"the fact that the Brazilian government...."*

Done

5. L.115: *"alleles encoding a functional enzyme.."*

Done

6. L.140: *"in plastic bags..."*

*"in plastic bag" was changed to "in a plastic bag"*

7. L.146: *"in a 1.5mL sterile..."*

Done

8. L.290: *"three in exon 1 and three in exon 2..."*

Done

9. L.299: *"in exon 1 while one deletion was identified in exon 2,..."*

Done

10. L.320: *"truncated protein with no active site..."*

Done

11. L.324: *"and derived from mutations.." But this is too strong. Rather, "non-synonymous and identical to sequences of the gene in the outgroup..."*

It seems that the reviewer misread this section: the mutations identified are derived when compared to the sequence of the outgroup, which represent the ancestral state of the site (i.e. they are different from the outgroup). We have not made any modifications.

12. L.331: *this may have a detrimental effect...*"

Done

13. L.337: *"Both indels have detrimental..."*

Done

14. L.359: *"distant from the region from which our samples..."*

*"a different geographic state"* was changed to *"the neighboring state"*

15. L.360: *"the allele has been segregating..."*

Done

16. L.386: *"The number of origins of resistance..."*

Done

17. L.391: *"resistance, a high mutation rate..."*

Done

18. L.411: *"In silico analysis, using predictions based on Drosophila, did..."*

Done

19. L.429: *"OXA sensitive populations..." (or susceptible).*

Done

20. L.431: *"different genetic backgrounds..."*

Done

21. L.451: *"and evolved de novo..."*

Done

22. L.644: *"(counts per minute)..." (or c.p.m.).*

Done

23. L.652: *"number of samples sequenced..."*

Done

24. Table 2, right-hand column, line 4: *"Impaired oxamniquine..."*

Done

**Reviewer #2:**

*Overall the manuscript is well written and addresses an interesting problem. The mechanisms that determine the likelihood of the development of resistance have been postulated, but there are not too many examples where there is experimental evidence. The authors provide population genetic analysis, crucially backed by experimental verification of allele function.*

*Loss of function, leading to resistance, is perhaps the most likely situation in which recurrent mutation leading to resistance is observed. The authors refer to Redman 2015 as an example of multiple recurrence of resistance mutations. The study by Rufener (Rufener, L., Maser, P., Roditi, I., Kaminsky, R. (2009) *Haemonchus contortus* acetylcholine receptors of the DEG-3 subfamily and their role in sensitivity to monepantel. *PLoS Pathogens* 5:e1000380. doi: 10.1371/journal.ppat.1000380), although using artificial selection for resistance, identified multiple independent mutations leading to monepantel resistance and these also included mutations at splice consensus sequences and aberrant transcripts.*

*This reference is now included in our introduction (line 79).*

*The authors identify physically distinct mutations that must represent independent origins. Since exon sequencing was used, along with substitution rate analysis for positive selection, I am surprised there was no phylogenetic analysis comparing the lab and wild resistant forms. The polymorphism surrounding the resistance mutations could be used to verify the origins of these mutations. If the laboratory and field mutations are identical in causing resistance, but had independent origins, this would be important information to add to their story.*

*Unfortunately we do not have sufficient variation in the region sequenced to conduct a phylogenetic analysis. However, linkage disequilibrium between two variant provides some information relevant to inferring origins of mutations. We observed the p.E142del in both the laboratory derived HR population (which originated from Puerto Rico) and in the field in Brazil. However, the HR p.E142del is found on an allele in combination with a p.L256W mutation, whereas this is not seen in the Brazilian field samples. A similar situation is observed with p.C35R mutation found with the p.P67L and p.G206V mutations in the MAP strain but with only p.P67L in our Brazilian field samples. One possible interpretation is that the p.E142del and p.C35R have multiple independent origins. We have now included a paragraph in the discussion to mention this possibility (line 377-384).*

*The way the authors examine the non-synonymous / synonymous substitution rates is a little unusual. The standard methodology would be to use either PAML (phylogenetic analysis using maximum parsimony) or HyPhy (as implemented on the [Datamonkey.org](http://Datamonkey.org) website).*

*Unfortunately, standard use of PAML or HyPhy is not possible when there are NO synonymous mutations, because this results in denominator of 0, and makes calculation of a ratio impossible. We therefore used a Fisher test to compare number of non-synonymous and synonymous changes to*

number of non-synonymous and synonymous sites instead of a dN/dS ratio. We now describe why conventional dN/dS ratio cannot be calculated (line 311).

*The authors discuss a deviation from Hardy-Weinberg equilibrium and an excess of homozygotes. One possible explanation for this would be that an allele exists in the sample for which the PCR amplification fails. If so, this would mimic an excess of homozygotes. It might be important to summarize details of the cases where DNA amplification was unsuccessful and the attempts to make sure it was a sample failure, rather than failure of the specific diagnostic PCR for some systematic reason.*

In our study, we never observed PCR failure of *SmSULT-OR*. The only failed amplifications were observed during the WGA step (probably due to the presence of polymerase inhibitors) but are unrelated to our *SmSULT-OR* amplifications. Hence we do not believe that null alleles are the explanation for the observed deficit. We have included the following sentence in the results to clarify this point “Null alleles are not likely to explain the deficit: while we had small numbers of samples for which WGA failed, *SmSULT-OR* was successfully amplified from all samples for which WGA was successful.” (lines 308-310)



**Minor editions** were done to correct and improve the manuscript. Here is the list of editions:

- Lines 4 and 20: The “M.” initial was removed from the author name of Winka Le Clec’h at her request.
- Lines 199 to 200: We define the non-reference alleles.
- Lines 215, 217, 238 to 239, 333: Typo corrections.
- Line 314: rewording for clarification.
- Lines 335 to 337 and 352: We modified the sentences to correct an omission.
- Lines 493 to 485: We updated the acknowledgement section.
- Lines 486 to 781: Bibliography was updated.
- Line 803: We replaced alternative with non-reference for clarity. We modified the table accordingly.
- Table 1: We added a column corresponding to the expected amplicon size for each primer pair.
- Table 2: We corrected some errors in numbers in addition of the corrections suggested by the reviewers.
- Lines 813, 816 and 817: We replaced “Supplementary” table, figure or movie by “Table S”, “Fig. S” and “Movie S” respectively. Modifications were done accordingly through the text.
- Table S1: Patient and sample ID were updated.

# Independent origins of loss-of-function mutations conferring oxamniquine resistance in a Brazilian schistosome population<sup>1</sup>

Frédéric D. Chevalier<sup>a</sup>, Winka~~M~~ Le Clec'h<sup>a</sup>, Nina Eng<sup>a</sup>, Anastasia R. Rugel<sup>b</sup>, Rafael Ramiro de Assis<sup>c</sup>, Guilherme Corrêa<sup>c,d</sup>, Stephen P. Holloway<sup>b</sup>, Xiaohang Cao<sup>b</sup>, P. John Hart<sup>b,e</sup>, Philip T. LoVerde<sup>b</sup>, Timothy J.C. Anderson<sup>a</sup>

## Affiliations:

- a. Texas Biomedical Research Institute, Department of Genetics, P.O. Box 760549, 78245-0549 San Antonio, Texas, USA
- b. Departments of Biochemistry and Pathology, University of Texas Health Science Center, San Antonio, Texas, 78229-3900, USA
- c. Centro de Pesquisas René Rachou, Fundação Oswaldo Cruz, Av. Augusto de Lima, 1715, Belo Horizonte, Minas Gerais, 30190-002, Brazil
- d. Vale Technology Institute, Rua Boaventura da Silva, 955, Belém, Pará, 66055-090, Brazil
- e. Department of Veterans Affairs, South Texas Veterans Health Care System, San Antonio, TX 78229, USA

## E-mail addresses:

- Frédéric D. Chevalier: [fcheval@txbiomed.org](mailto:fcheval@txbiomed.org)
- Winka~~M~~ Le Clec'h: [winkal@txbiomed.org](mailto:winkal@txbiomed.org)
- Nina Eng: [nle3@georgetown.edu](mailto:nle3@georgetown.edu)
- Anastasia R. Rugel: [Stahls@uthscsa.edu](mailto:Stahls@uthscsa.edu)
- Rafael Ramiro de Assis: [rafael.assis@cpqrr.fiocruz.br](mailto:rafael.assis@cpqrr.fiocruz.br)
- Guilherme Corrêa-Oliveira: [guilherme.oliveira@itv.org](mailto:guilherme.oliveira@itv.org)
- Stephen P. Holloway: [holloways@uthscsa.edu](mailto:holloways@uthscsa.edu)
- Xiaohang Cao: [caox@uthscsa.edu](mailto:caox@uthscsa.edu)
- P. John Hart: [hartp@uthscsa.edu](mailto:hartp@uthscsa.edu)
- Philip T. LoVerde: [loverde@uthscsa.edu](mailto:loverde@uthscsa.edu)
- Timothy J.C. Anderson: [tanderso@txbiomed.org](mailto:tanderso@txbiomed.org)

**Corresponding authors:** Frédéric D. Chevalier and Timothy J.C. Anderson

---

<sup>1</sup> Note: Supplementary data associated with this article

31 **Abstract**

32 Molecular surveillance provides a powerful approach to monitoring resistance status of parasite  
33 populations in the field and for understanding resistance evolution. Oxamniquine (OXA) was used to  
34 treat Brazilian schistosomiasis patients (mid-1970s to mid-2000s) and several cases of parasite infections  
35 resistant to treatment were recorded. The gene underlying resistance (*SmSULT-OR*) encodes a  
36 sulfotransferase required for intracellular drug activation. Resistance has a recessive basis and occurs  
37 when both *SmSULT-OR* alleles encode for defective proteins. Here we examine *SmSULT-OR* sequence  
38 variation in a natural schistosome population in Brazil ~40 years after the first use of this drug. We  
39 sequenced *SmSULT-OR* from 189 individual miracidia (1-11 per patient) recovered from 49 patients, and  
40 tested proteins expressed from putative resistance alleles for their ability to activate OXA. We found  
41 nine mutations (4 non-synonymous SNPs, 3 non-coding SNPs, and two indels). Both mutations  
42 (p.E142del and p.C35R) identified previously were recovered in this field population. We also found two  
43 additional mutations (a splice site variant and 1 bp coding insertion) predicted to encode non-functional  
44 truncated proteins. Two additional substitutions (p.G206V, p.N215Y) tested had no impact on OXA  
45 activation. Three results are of particular interest: (i) we recovered the p.E142del mutation from the  
46 field: this same deletion is responsible for resistance in an OXA-selected laboratory parasite population  
47 (ii) frequencies of resistance alleles are extremely low (0.27-0.8%), perhaps due to fitness costs  
48 associated with carriage of these alleles (iii) that four independent resistant alleles were found is  
49 consistent with the idea that multiple mutations can generate loss-of-function alleles.

50

51 **Keywords:** *Schistosoma mansoni*, oxamniquine resistance, sulfotransferase, loss-of-function,  
52 biochemical assay, soft selective event

53

54 **Highlights:**

- 55 • We surveyed allelic variation in a schistosome drug resistance gene
- 56 • Four independent origins of alleles encoding loss-of-function proteins
- 57 • Resistance mutations are at very low frequency (< 0.0080)
- 58 • Loss-of-function mutations tested using an *in vitro* oxamniquine activation assay

59

60 **Abbreviations:**

- 61 • Indel: insertion/deletion
- 62 • OXA: oxamniquine
- 63 • PCR: polymerase chain reaction
- 64 • PZQ: praziquantel

- 65 • SmSULT-OR: *Schistosoma mansoni* sulfotransferase oxamniquine resistance
- 66 • SNP: single nucleotide polymorphism
- 67 • UTR: untranslated region
- 68 • WGA: whole genome amplification

69

70

## 71 1. Introduction

72 Surveys of drug resistance alleles using molecular markers provide a powerful approach to  
73 identify pathogen populations in which resistance is emerging, to map resistance spread, and  
74 for evidence-based resistance management. Molecular approaches are now widely used for  
75 tracking resistance in malaria (Ashley et al., 2014; Pearce et al., 2009), HIV (Panichsillapakit et  
76 al., 2015) and bacterial diseases (Bhembe et al., 2014), and for managing insecticide resistance  
77 (Djègbè et al., 2014; Essandoh et al., 2013). Such methods are also now actively used for  
78 monitoring resistance in helminths of veterinary importance such as *Haemonchus contortus*  
79 (Chaudhry et al., 2015; Redman et al., 2015; Rufener et al., 2009)  
80 , and have enormous potential for monitoring resistance in helminth parasites infecting  
81 humans, because existing phenotypic screening methods based on reductions in production of  
82 eggs or larval stages are insensitive for detection of low frequency resistance alleles, and  
83 cannot detect recessive resistance alleles present in heterozygous worms. However, molecular  
84 surveillance is only possible ~~only~~ when resistance genes have been identified, which is rarely  
85 the case for human helminth infections such as schistosomiasis.

86 Schistosomiasis, caused by three major species of blood flukes of *Schistosoma* genus (Colley  
87 et al., 2014; Dye et al., 2013), is the second most important tropical parasitic disease after  
88 malaria (Steinmann et al., 2006), affecting an estimated 260 million people across Africa, Asia,  
89 and South America, and killing over 200,000 people per year. Two drugs are available for  
90 treating schistosomiasis. Praziquantel (PZQ) is currently used as a monotherapy in expanding  
91 mass drug administration programs in Africa (Dye et al., 2013) making resistance evolution a  
92 major concern. A second drug, oxamniquine (OXA), is the focus of this paper. OXA acts  
93 specifically against *S. mansoni*, which is found in Africa, together with *S. haematobium*, and in  
94 South America, where it is the only species present. OXA was manufactured in Brazil by Pfizer  
95 (Cheetham, 1994) and widely used to treat *S. mansoni* infections ~~(~~from the mid-1970s to the  
96 mid-2000s (Coura and Amaral, 2004), but has now been replaced by PZQ as the first line drug.

97 Schistosomes resistant to OXA were first identified in Brazil in 1973 (Naftale Katz et al.,  
98 1973), around the same time as the first clinical study of OXA treatment (N. Katz et al., 1973).  
99 This rapid emergence of resistance was most likely due to the previous treatment of the same  
100 populations with the related drug hycanthone (Coura and Conceição, 2010; Katz et al., 1968), as  
101 both OXA and hycanthone have the same target (Jansma et al., 1977; Pica-Mattoccia et al.,  
102 1993) and the same mechanism of resistance (Pica-Mattoccia et al., 1992a)(~~;-~~). ~~Latter.~~ Later  
103 genetic studies showed that resistance is a recessive single locus trait (Cioli and Pica-Mattoccia,  
104 1984; Pica-Mattoccia et al., 1993), most likely involving the absence of a sulfotransferase  
105 activity necessary for drug activation in resistant schistosomes (Pica-Mattoccia et al., 2006). The  
106 gene encoding the *S. mansoni* sulfotransferase involved in OXA resistance (*SmSULT-OR*) was

107 recently identified by classical quantitative trait mapping in concert with crystallographic and  
108 functional analyses (Valentim et al., 2013). This work identified an amino acid deletion  
109 (p.E142del) in the laboratory selected resistant parasite (HR), while an independent loss-of-  
110 function mutation (p.C35R) was identified in a field-collected resistant parasite line (MAP).

111 The identification of the gene involved in OXA resistance now allows us to examine  
112 distribution of resistance alleles of *SmSULT-OR* in natural populations. Despite the fact that the  
113 Brazilian government has switched from OXA to PZQ during the last decade (Utzinger et al.,  
114 2003), the recessive nature of OXA resistance allows the persistence of these alleles, because  
115 alleles encoding non-functional enzyme are not counter-selected as long as they segregate with  
116 alleles encoding a functional ~~alleles~~enzyme. We collected miracidia larval stages from a village  
117 in Minas Gerais, Brazil, and sequenced the *SmSULT-OR* gene in these samples. We sought to  
118 answer several questions: How common are resistance alleles? How many times have OXA  
119 resistance alleles arisen? Are the OXA resistance alleles selected in the laboratory and identified  
120 using linkage mapping actually present in nature? More broadly, our goal is to better  
121 understand the evolution of drug resistance in schistosomes and to demonstrate the utility of  
122 molecular screening approaches in anticipation that the gene(s) underlying PZQ resistance will  
123 soon be identified.

124

125

126 **2. Material and methods**

127 *2.1 Ethics statement*

128 Stool samples were collected in accordance to the Research Ethics Committee of UNIFESP  
129 procedures (process number CAAE: 15567313.8.0000.5091)

130

131 *2.2 Sampling of Schistosoma mansoni miracidia*

132 We collected stools from school children from Ponto dos Volantes (Minas Gerais, Brazil, GPS  
133 coordinates: S 16°45'3.301", W 41°30'13.755") and shipped these at 4°C by ground  
134 transportation overnight to Universidade Federal de Minas Gerais in Belo Horizonte. We  
135 processed samples as follows: several grams of stools were filtered through three layers of  
136 sieves (mesh size: 250 to 45 µm) to obtain schistosome eggs. Eggs were transferred from the third  
137 sieve grid to a Petri dish and exposed under artificial light for at least one hour. All filtering  
138 steps and egg transfer were performed with locally available bottled mineral water.

139 Washed eggs were observed under a stereomicroscope. For each patient, 1 to 11 living  
140 miracidia were sampled individually in ~2 µL of water and spotted onto CloneSaver FTA cards  
141 (GE Healthcare Life Sciences). Spotted samples can be easily located on the card thanks to the  
142 card pink dye turning white after water contact. Full cards were allowed to dry one hour at  
143 room temperature on the bench before being stored in a plastic bag and finally shipped to San  
144 Antonio, Texas, USA.

145

146 *2.3 Preparation of FTA samples for whole genome amplification*

147 For each sample, we removed a 2 mm diameter disc from the FTA card using a 2 mm Harris  
148 Micro-punch (GE Healthcare Life Sciences). The 2 mm disc corresponds to the entire spot  
149 containing the whole miracidium. Each punch was placed individually in a 1.5 mL sterile tube.  
150 Punches were washed 3 times with FTA Purification Reagent (GE Healthcare Life Sciences) then  
151 rinsed 2 times with TE<sup>-1</sup> buffer (10 mM Tris, 0.1 mM EDTA, pH 8). Washing and rinsing steps  
152 were performed by adding 200 µL of solution in each tube followed by 5 minutes of incubation  
153 on a nutating mixer (24 RPM) at room temperature and then by discarding the solution while  
154 minimizing contact between the pipette tip and the punch. Punches were finally dried in tubes  
155 for 10 minutes at 56°C on a dry bath incubator.

156

157 *2.4 Whole genome amplification*

158 We performed whole genome amplification (WGA) on each punch using the illustra GenomiPhi  
159 V2 DNA Amplification kit (GE Healthcare Life Sciences). Punches were transferred in 0.2 mL  
160 sterile tubes using a sterile tip. We performed reactions following the manufacturer's  
161 instructions, immersing each punch in 9  $\mu\text{L}$  of sample buffer and keeping tubes at all times on  
162 ice after the denaturation step. After amplification, we quantified DNA using the Qubit dsDNA  
163 BR assay (Invitrogen).

164

### 165 *2.5 Sequencing of SmSULT-OR exons*

166 The two exons of the *SmSULT-OR* gene were amplified and sequenced independently. Each PCR  
167 reaction was performed using the TaKaRa Taq kit (Clontech) and composed of 9.325  $\mu\text{L}$  of  
168 sterile water, 1.5  $\mu\text{L}$  of 10 $\times$  buffer, 1.2  $\mu\text{L}$  of dNTP (2.5 mM each), 0.9  $\mu\text{L}$  of  $\text{MgCl}_2$  (25 mM),  
169 0.5  $\mu\text{L}$  of each primer (10  $\mu\text{M}$ ; Table 1), 0.075  $\mu\text{L}$  of Taq polymerase (5  $\text{U}\cdot\mu\text{L}^{-1}$ ) and 1  $\mu\text{L}$  of DNA  
170 template. Amplifications were done using GeneAmp PCR system 9700 thermocycler (Applied  
171 Biosystems) with the following program: 95°C for 5 minutes, [95°C for 30 seconds, 60°C for 30  
172 seconds, 72°C for 45 seconds]  $\times$  35 cycles, 72°C for 10 minutes.

173 Exon 1 required a nested PCR in order to obtain a specific product. Products from the first  
174 PCR were cleaned up by adding 4  $\mu\text{L}$  of ExoSAP-IT (Affymetric USB products). Tubes were then  
175 incubated at 37°C for 30 minutes and at 80°C for 15 minutes with a thermocycler. Cleaned PCR  
176 products were then used as templates for the second PCR following the above protocol.

177 Sequencing reactions were performed using BigDye<sup>®</sup> Terminator v3.1 cycle sequencing kit  
178 (Applied Biosystems) on final PCR products. PCR products were cleaned up using ExoSAP-IT as  
179 described above. Sequencing reactions were performed using 2.59  $\mu\text{L}$  of sterile water, 1  $\mu\text{L}$  of  
180 5 $\times$  running buffer, 0.25  $\mu\text{L}$  of BigDye Terminator ready reaction mix (Applied Biosystems),  
181 0.16  $\mu\text{L}$  of forward or reverse primer used in the final PCR step, and 1  $\mu\text{L}$  of final PCR product.  
182 Sequencing fragments were generated using GeneAmp PCR system 9700 thermocycler (Applied  
183 Biosystems) with the following program: 96°C for 1 minute, [96°C for 10 seconds, 50°C for 5  
184 seconds, 60°C for 4 minutes]  $\times$  25 cycles. Sequencing reactions were cleaned up using BigDye  
185 XTerminator<sup>®</sup> purification kit (Applied Biosystems). In each reaction, 20.45  $\mu\text{L}$  of SAM<sup>™</sup> solution  
186 and 4.55  $\mu\text{L}$  of XTerminator<sup>™</sup> solution were added. Reactions were then vortexed for 30  
187 minutes and run on a 3730xl DNA Analyzer (Applied Biosystems).

188 Sequencing files were first screened using FinchTV (v1.4.0; Geospiza Inc.) to identified failed  
189 sequencing reactions. In case of failure, sequencing reactions were performed a second time.

190



191 2.6 Variant identification and functional impact evaluation

192 We scored variants using PolyPhred software (v6.18) (Nickerson et al., 1997) which relies on  
193 Phred (v0.020425.c), Phrap (v0.990319), and Consed (v29.0) software, analyzing each exon  
194 independently. We identified single nucleotide polymorphisms using a minimum phred quality  
195 score (-q) of 40, a minimum genotype score (-score) of 90, and a reference sequence that  
196 includes *SmSULT-OR* gene and surrounding regions (position 1519500 to 1525200 of  
197 chromosome 6 of *S. mansoni* reference genome v5.0,  
198 [ftp://ftp.sanger.ac.uk/pub/pathogens/Schistosoma/mansoni/genome/Assembly-](ftp://ftp.sanger.ac.uk/pub/pathogens/Schistosoma/mansoni/genome/Assembly-v5/sma_v5.0.chr.fa.gz)  
199 [v5/sma\\_v5.0.chr.fa.gz](ftp://ftp.sanger.ac.uk/pub/pathogens/Schistosoma/mansoni/genome/Assembly-v5/sma_v5.0.chr.fa.gz)). Variant sites were labeled as non-reference alleles if they were  
200 different from the reference sequence. We identified Insertion/deletion (indel) polymorphisms  
201 using a minimum phred quality score (-q) of 40, a minimum genotype score (-score) of 80.  
202 Polymorphisms were visually validated using Consed. All the sequences were submitted to  
203 GenBank (GenBank accession no ~~XXX-XXX~~[KU951903-KU952091](#)).

204 Nucleic sequences showing mutations were translated *in silico* into protein sequences using  
205 Translate tool from ExpASy portal (Artimo et al., 2012).

206 We evaluated the potential functional impact of identified polymorphisms on RNA features  
207 and on protein structure *in silico*. Modification of RNA motifs and sites were analyzed using  
208 RegRNA2.0 website (Chang et al., 2013) for all available features with *Drosophila melanogaster*  
209 as reference species when required. Modifications in protein structure were assessed using the  
210 mutagenesis function of PyMol software (v1.7.2.0, Schrödinger, LLC) using the structure of  
211 *SmSULT-OR* determined previously (PDB code 4MUB, Valentim et al., 2013).

212

213 2.7 Population genetics analysis

214 We evaluated population structure by testing for Hardy-Weinberg equilibrium, measuring  
215 fixation indices ( $F_{st}$  and the  $F_{is}$ ) of parasites using Genepop (Rousset, 2008) with default options  
216 and considering schistosomes from a given patient as belonging to a same population. To  
217 identify positive selection, we calculated the number of synonymous (s) and non-synonymous  
218 (n) sites (Nei and Gojobori, 1986) and compared these values to synonymous (S) and non-  
219 synonymous (N) changes. We also performed a McDonald-Kreitman test using MKT server  
220 (<http://mkt.uab.es>; Egea et al., 2008). The *SmSULT-OR* homolog sequence in *S. rodhaini* was  
221 used as an outgroup and was obtained using tblastx from the NCBI server (Coordinators, 2015)  
222 on the *S. rodhaini* genome assembly (GenBank accession no. **GCA\_000951475.1**) using *SmSULT-*  
223 *OR* sequence (GenBank accession no. **KF733459.1**) as query.

224

## 225 2.8 Recombinant SmSULT-OR protein production

226 The *SmSULT-OR* sequence from the reference genome (Smp\_089320; GenBank accession no.  
227 **HE601629.1**) was used to create a codon optimized synthetic gene (GenScript) which was  
228 subcloned into the pAG8H vector derived from pKM260 (Melcher, 2000). We introduced  
229 mutations using a Phusion site-directed mutagenesis protocol (ThermoFisher Scientific).  
230 Transformed *Escherichia coli* strain BL21 pLysS (Promega) were grown at 37°C until the  $A_{600}$   
231 reached 0.7, we decreased the temperature to 18°C and expression induced by the addition of  
232 isopropyl- $\beta$ -D-thiogalactoside (IPTG) at a final concentration of 1 mM. The cells were washed  
233 and resuspended in 50 mL 50 mM Tris pH 8.0, 500 mM NaCl (column buffer) containing 250  $\mu$ L  
234 Sigma protease inhibitor cocktail per liter of culture and lysed by sonication on ice. The clarified  
235 supernatant was loaded onto a Ni<sup>2+</sup>-NTA affinity chromatography column (GE Healthcare),  
236 washed with 5 volumes of column buffer, and eluted using a 10-500 mM imidazole gradient.  
237 We pooled fractions identified as the Smp\_089320 via SDS-PAGE and added His-tagged TEV  
238 protease at a Smp\_089320•protease ratio of 15•1. The resulting solution was dialyzed ~~the~~  
239 ~~resulting solution~~ overnight at 4°C against 50 mM Tris pH 8.0, 100 mM NaCl, 2 mM  
240 dithiothreitol (DTT). We passed the dialysate over the Ni<sup>2+</sup>-NTA column again to remove the His  
241 tag and the His-tagged TEV protease, while the cleaved target protein flowed through. The  
242 sample was loaded onto a GE-pre-packed Q anion exchange column and eluted with a 0.1-  
243 1.0 M NaCl gradient. We pooled fractions containing Smp\_089320 as identified by SDS-PAGE  
244 and dialyzed overnight at 4°C against 25 mM Tris pH 8.5, 50 mM NaCl, 2 mM reducing agent  
245 tris-(carboxyethyl)-phosphine (TCEP) to prevent formation of intermolecular disulfide bonds.  
246 The product was ~98% pure as estimated by SDS-PAGE. We concentrated the purified  
247 Smp\_089320 protein to 10 mg.mL<sup>-1</sup> using the calculated extinction coefficient  $\epsilon = 39,880 \text{ mol}^{-1}$   
248  $\cdot \text{cm}^{-1}$ .

## 249 2.9 Oxamniquine activation assay

251 This assay utilizes the fact that OXA is a prodrug that is enzymatically converted into a highly  
252 reactive molecule that covalently binds intracellular components such as DNA (Pica-Mattocchia  
253 et al., 1989). Because the original assay employs worm extracts which require time for  
254 preparation and introduce unpredictable variations in SmSULT-OR concentration (Pica-  
255 Mattocchia et al., 1992a; Valentim et al., 2013), we developed an improved *in vitro* assay that  
256 uses purified recombinant SmSULT-OR enzyme. This *in vitro* assay measures the enzymatic  
257 sulfonation of tritiated OXA molecules which then bind gDNA: The resultant radioactive DNA-  
258 OXA complexes can then be quantified by a scintillation counter. Enzymes produced by non-  
259 functional *SmSULT-OR* alleles cannot sulfonate OXA so no DNA-OXA complexes are formed.

260 Recombinant proteins were expressed and purified commercially by GenScript (p.C35R,  
261 p.P67L, p.E142del; Valentim et al., 2013) or by the Hart laboratory (p.G206V and p.N215Y). To  
262 determine which recombinant protein has the ability to activate OXA, 1 nM from each  
263 recombinant protein was added to 90  $\mu\text{L}$  of a protease inhibitor cocktail (PIC) consisting of  
264 0.1 M HEPES pH 7.4, 0.1mM leupeptin, 2  $\mu\text{M}$  E-64, 2  $\mu\text{M}$  pepstatin A, 0.1 U of aprotinin, and  
265 10  $\text{ng}\cdot\mu\text{L}^{-1}$  sheared *S. mansoni* gDNA as a final target. For each reaction 100  $\mu\text{Ci}$  of  $^3\text{H}$ -OXA (Pica-  
266 Mattoccia et al., 1989) was solubilized in 2  $\mu\text{L}$  DMSO and added to 10  $\mu\text{L}$  of a mixture containing  
267 the enzyme cofactors ATP and  $\text{MgCl}_2$  at 50 mM each, and PAPS at 1 mM. The radiolabeled OXA  
268 and co-factor mix was then added to the PIC mix containing the recombinant protein. The  
269 resulting reaction was incubated for 2.5 hours at 37°C and stopped by adding 3 volumes of 0.1%  
270 SDS in 0.1 M sodium bicarbonate. The reaction was then extracted 3 times with 2 volumes of  
271 dichloromethane and the aqueous phase was counted in a liquid scintillation spectrometer  
272 (Beckman LS 6500 Scintillation Counter, USA) during 10 minutes. We also measured a blank  
273 solution (water) and the background scintillation. Blank and background values were subtracted  
274 to sample values. We performed three independent reactions for each recombinant protein.

275

#### 276 *2.10 Statistical analysis*

277 Statistical analyses were done using R (v3.1.3) (R Core Team, 2015). For synonymous and non-  
278 synonymous changes, data were compared using a Fisher's exact test. For the OXA activation  
279 assay, the data were compared with a Welch t-test after testing for normality (Shapiro test,  $p >$   
280 0.05).

### 281 3. Results

#### 282 3.1 Brazilian samples

283 We collected 232 FTA preserved miracidium samples from 51 patients (range: 1-12, mean±sd:  
284 4.55±3.65). We successfully amplified DNA from 204 samples (87.93%) from 50 patients (range:  
285 1-11, mean±sd: 4.08±3.26). Among the amplified samples, 189 from 49 patients (range: 1-11,  
286 mean±sd: 3.86±3.18) contained schistosome DNA (92.65% of amplified samples, 81.47% of  
287 total samples). Among the 189 samples, we sequenced exon 1 from 183 samples and exon 2  
288 from 188 samples. All samples had at least one exon sequenced (~~Supp. table 4~~Table S1).

289

#### 290 3.2 SmSULT-OR variants in a Brazilian schistosome population

291 We scored nine mutations: four non-synonymous single nucleotide polymorphisms (SNPs), one  
292 insertion and one deletion in the coding region, and three non-coding SNPs (Table 2, ~~Supp.~~  
293 ~~table 4~~Table S1). The number of mutations in each exon (three in ~~the~~exon 1 and three in~~the~~  
294 exon 2) is not different regarding the length of the exon (327 bp and 447 bp, respectively)  
295 (Fisher's exact test,  $p = 0.7$ ).

296 Among the seven SNPs, five (71.43%) were transitions and two (28.57%) were  
297 transversions. Four of the SNPs were located in the exonic region, two in exon 1 and two in  
298 exon 2. Three were present at very low frequency (0.0027-0.0053) while one was present at  
299 very high frequency (0.95). One SNP was identified at the first position of the intron at a low  
300 frequency (0.0056). The two remaining SNPs were found in the 3' UTR, one at high frequency  
301 (0.96), and one at low frequency (0.03).

302 One insertion was identified in ~~the~~exon 1 while one deletion was identified in~~the~~ exon 2,  
303 both at very low frequency (0.0027 and 0.0080, respectively).

304 Low frequency mutations were found in heterozygous or in homozygous states among the  
305 samples. Observing rare SNPs present as homozygotes was surprising, suggesting population  
306 structure. The test for Hardy-Weinberg equilibrium showed a global deficit in heterozygosity  
307 ( $p < 0.0001$ ). This is likely due to deficit of heterozygous genotypes within host ( $F_{is} = 0.3251$ )  
308 rather than due to population differentiation between infections ( $F_{st} = 0.0153$ ). Null alleles are  
309 not likely to explain the deficit: while we had small numbers of samples for which WGA failed,  
310 SmSULT-OR was successfully amplified from all samples for which WGA was successful.

311 Because of the absence of the synonymous mutations which precludes dN/dS calculation,  
312 we compared synonymous (S) and non-synonymous (N) changes to synonymous (s) and non-  
313 synonymous (n) sites to evaluate evidence for selection on *SmSULT-OR*. This comparison

314 | reveals no differences (Fisher's exact test,  $p = 1$ ) indicating that no ~~particular pressure~~evidence  
315 | for selection. We also tested directional evolution by performing a McDonald-Kreitman test  
316 | using the homolog sequence of *SmsULT-OR* from *S. rodhaini* as outgroup. We found no  
317 | evidence for directional evolution ( $\chi^2 = 1.466$ ,  $p = 0.225$ ).

318

### 319 | 3.3 Functional impacts of mutations

#### 320 | 3.3.1 Non-coding variants

321 | We evaluated the functional impacts of the polymorphisms identified based on RNA features  
322 | such as binding sites or splicing or regulatory motifs (Table 2). The mutation g.649G>A was  
323 | predicted to modify the unique splice donor site at the end of the exon 1. The disruption of the  
324 | splicing site leads to translation of the beginning of the intron which ends four codons later due  
325 | to the introduction of a stop codon. This results in a truncated protein with ~~absence of no~~  
326 | site (Fig. 1, ~~Supp. movie~~Movie S1). Mutations present on the 3' UTR were not predicted to be in  
327 | any regulatory sites.

#### 328 | 3.3.2 Coding variants

329 | All SNPs identified in the coding sequence of the gene were non-synonymous, and derived  
330 | mutations relative to the outgroup *S. rodhaini* (Table 2). c.103T>C induced a substitution of  
331 | cysteine to arginine (p.C35R) leading to a misfolded protein as shown previously (Valentim et  
332 | al., 2013) (Fig. 1). c.200C>T induced a substitution of proline to leucine (p.P67L) and was  
333 | previously found in the OXA-sensitive strain (Valentim et al., 2013) (Fig. 1); ~~);~~ this mutation  
334 | therefore does not reduce enzyme activity. c.617G>T induced a substitution of glycine to valine  
335 | (p.G206V) which occurs close the binding site of the PAPS co-factor and was previously  
336 | observed in field-collected OXA-resistant strain (Valentim et al., 2013); ~~);~~ but was never tested .  
337 | We postulated that this mutation may have a potential detrimental effect on co-factor binding  
338 | and finally enzyme activity (Fig. 1, ~~Supp. movie~~Movie S1). The mutation c.643A>T induced a  
339 | substitution of asparagine to tyrosine (p.N215Y) which occurs on a helix connected to a loop  
340 | involved in co-factor binding. This mutation is predicted to have little impact on protein  
341 | structure: We therefore postulated that this will not change protein function (Fig. 1, ~~Supp.~~  
342 | ~~movie~~Movie S1).

#### 343 | 3.3.3 Indels

344 | ~~The two~~Both indels have ~~both~~ detrimental effects on the enzyme (Table 2). The insertion  
345 | c.214\_125insA induces a frame shift leading to an early stop codon six codons after the  
346 | mutation. This frame shift is predicted to produce a truncated enzyme with no active site. The

347 deletion c.424\_426delGAA is known to disrupt oxamniquine binding from previous functional  
348 analyses (Valentim et al., 2013).

349

#### 350 3.4 Oxamniquine activation assay

351 We produced two recombinant SmSULT-OR enzymes carrying the mutations p.G206V and  
352 p.N215Y in order to experimentally test whether these two ~~new~~ mutations impact OXA-  
353 activation resulting in OXA resistance. We also tested known resistance alleles (p.C35R and  
354 p.E142del) as controls. The newly identified alleles are able to activate OXA as well as the  
355 reference allele (wild type) which does not carry any of these mutations (Welch t-test,  $t < -1.55$ ,  
356  $p > 0.18$ ) while the known resistance alleles showed no activation as expected (Welch t-test,  $t >$   
357  $5.58$ ,  $p < 0.021$ ). Therefore the two mutations tested (p.G206V and p.N215Y) did not disrupt co-  
358 factor binding or otherwise interfere with enzymatic activity.

359

360 **4. Discussion**

361 *4.1. Identical mutations in laboratory and field selected parasites*

362 *SmsULT-OR* sequences from 189 miracidia collected from 49 Brazilian patients revealed nine  
363 mutations, including both mutations previously implicated in OXA resistance (Valentim et al.,  
364 2013). We found the p.C35R mutation, previously identified in the MAP strain. MAP was  
365 sampled from a patient living in a city of São Paulo state (Fig. S1) (Pica-Mattoccia et al.,  
366 1992b) ~~Supp. fig. 1) (, a different geographic, the neighboring~~ state from which our samples  
367 were collected. This suggests that the allele ~~have~~has been segregating in Brazilian parasite  
368 populations for more than 25 years. The second variant identified in the field, p.E142del, was  
369 previously found in the HR laboratory strain, which was initially sampled from a Puerto-Rican  
370 patient and subsequently selected with hycanthon in the laboratory (Fig. S1) (Cioli and Pica-  
371 Mattoccia, 1984) ~~Supp. fig. 1) (,). This mutation could have arisen spontaneously in the~~  
372 laboratory. However, given that laboratory schistosome lines are maintained as outbred  
373 populations, the simplest explanation is that this mutation was segregating within the parasite  
374 population originally established in the laboratory. That we located this same deletion in two  
375 miracidia from Brazil and a parasite line collected from Puerto-Rico suggests that this allele may  
376 be widespread in schistosome populations from the New World.

377 It is not clear from our data whether the p.E142del seen in HR and Brazilian field samples  
378 arose independently or has a single origin. The HR p.E142del is found together with another  
379 mutation (p.L256W) (Valentim et al., 2013), which is absent from the p.E142del allele found in  
380 the Brazilian miracidia, providing some evidence for independent origins. Similarly, MAP differs  
381 from the Brazilian miracidia carrying the p.C35R mutation: while both also carry p.P67L, MAP  
382 carries an additional p.G206V mutation. Additional flanking SNP data will be required to  
383 critically test whether the p.E142del and p.C35R OXA resistance mutations have arisen a single  
384 time, or have multiple independent origins.

385 Laboratory selection is commonly used to explore the genetics of pathogen resistance, but a  
386 concern with this approach is that the mutations selected in the laboratory may poorly  
387 represent those occurring in nature. That we identify the same mutations in laboratory and  
388 field selected parasites is extremely encouraging, because ongoing work to identify mutations  
389 involved in PZQ resistance also utilizes laboratory selected parasites (Couto et al., 2011). We  
390 note that laboratory selection experiments with *Plasmodium* also tend to identify the same  
391 genes and often the same mutations that are observed in the field (Anderson et al., 2011),  
392 further validating this approach.

393

394 *4.2. Multiple origins of OXA resistance*

395 Besides the two known alleles, two of these new mutations, c.214\_215insA and g.328G>A, are  
396 predicted to confer oxamniquine resistance: both introduce premature insertion of a stop  
397 codon producing a protein without an active site. These mutations therefore add two additional  
398 loss-of-function mutations that were probably selected during the OXA treatment. That four  
399 independent mutations are found in a single sampled parasite population is remarkable.  
400 Multiple origins have previously been observed in the evolution of resistance to benzimidazole  
401 drugs in the gastrointestinal nematode *Haemonchus* (Redman et al., 2015)~~(1)~~. ~~The numbers. The~~  
402 ~~number~~ of origins of resistance alleles is expected to depend on the size of the parasite  
403 population and the rate at which mutation generates resistant alleles (Messer and Petrov,  
404 2013). In the case of *H. contortus*, the enormous size of parasite populations is likely to be the  
405 main driver, as only several specific mutations within  $\beta$ -tubulin can confer resistance. In the  
406 case of OXA resistance, a high mutation rate may be expected as the main driver, because  
407 multiple different mutations within *SmSULT-OR* can generate non-functional proteins. It is also  
408 possible that OXA-resistant alleles were present within Brazilian *S. mansoni* populations prior to  
409 hycanthone or OXA treatment. Such standing variation may even have been present prior to  
410 introduction of *S. mansoni* into South America. Analysis of *SmSULT-OR* in African populations,  
411 where OXA was not used extensively, will help answer this question.

412

#### 413 4.3. Importance of functional assays for testing gene function

414 Work on OXA resistance is simplified because we have an effective *in vitro* functional assay for  
415 screening allelic variants. The assay we used is an improvement on those previously described  
416 (Pica-Mattocchia et al., 1992a; Valentim et al., 2013), because worm homogenates are replaced  
417 by recombinant SmSULT-OR proteins. We identified two additional exon 2 substitutions  
418 (p.G206V, p.N215Y): Structural analyses suggested that one of these mutations (p.G206V) may  
419 disrupt OXA activation, by interfering with binding of the co-factor (PAPS), while the other  
420 (p.N215Y) is likely to have minimal impact on function. We were able to directly test these  
421 predictions by performing OXA activation assays. These assays demonstrated that neither  
422 mutation prevents OXA activation, allowing us to reject our prediction for p.G206V and confirm  
423 our prediction for p.N215Y. Hence, while structural studies are useful for formulating  
424 hypotheses about the consequences of mutations, functional assays are essential for critical  
425 testing of these hypotheses.

426 The two last mutations were found in the 3' UTR of the cDNA. *In silico* analysis, using  
427 predictions based on *Drosophila*, did not reveal regulatory sites in these regions, suggesting  
428 that these mutations do not impact function. However, *Drosophila* may be a poor model to use:  
429 when more information on *SmSULT-OR* regulatory regions become available, new analyses of  
430 these two mutations may reveal potential effects on mRNA stability or translation rate.



431

#### 432 4.4. Low frequency of resistance mutations

433 The allele frequency of all 4 OXA resistance alleles combined is 3.8%, and only two parasites of  
434 183 sampled (1%) are homozygous and therefore expected to be phenotypically resistant. The  
435 low frequency of the OXA resistance alleles can be explained by two non-exclusive hypotheses.  
436 First, resistance alleles may have remained at low levels even when OXA was the first line drug  
437 in Brazil. Second, fitness costs associated to these alleles may have driven reductions in allele  
438 frequency after the abandon of OXA treatment. However OXA resistance alleles still persist  
439 within the populations in heterozygous state, the cost being present only when worms are  
440 homozygous for the defective alleles.

441 Whether there is a cost associated with OXA resistance is questionable because miracidia  
442 homozygous for resistance alleles were found in the field from the present study. A previous  
443 study showed reduction in infectivity and egg production in OXA resistant parasites relative to  
444 the OXA ~~resistant~~susceptible populations from which they were isolated (Cioli et al., 1992).  
445 However, this study suffers from a methodological limitation, because resistant and susceptible  
446 laboratory populations had different ~~genetics~~genetic backgrounds, complicating interpretation.  
447 Comparison of isogenic wildtype and genetically manipulated resistant parasites, or analysis of  
448 fitness in the progeny of a genetic cross between OXA resistant and sensitive parasites would  
449 allow measurement of associated fitness costs, while minimizing confounding background  
450 effects.

451

#### 452 4.5. Implications for schistosome biology and control

453 New drugs are urgently needed for schistosome control because treatment currently relies  
454 on widespread monotherapy with PZQ. OXA is effective only against *S. mansoni*, but new OXA-  
455 derivatives are under active development, with the aim of making compounds that are active  
456 against all three major schistosome species infecting human (Taylor et al., 2015). If such  
457 derivatives are to be deployed clinically, understanding the capacity for resistance evolution in  
458 schistosome populations is of critical importance. For example, surveys of sequence variation in  
459 *SmSULT-OR* or the *S. haematobium* homologue would be an important prerequisite for field  
460 deployment of an OXA-derivative active against both these species in Africa.

461 Our results have both positive and negative implications for field deployment of OXA  
462 derivatives. That multiple resistance alleles are present in a single parasite population suggests  
463 that resistance alleles may evolve and spread rapidly. On the positive side, existing resistance  
464 alleles are currently at extremely low frequency. It will be essential that OXA derivatives are

465 deployed with appropriate partner drugs to minimize rate of resistance evolution. We note that  
466 resistance to the antimalarial atovaquone was observed in the first clinical trial of this drug  
467 | (Looareesuwan et al., 1996) ~~(-) and evolves and evolved~~ *de novo* in different treated patients  
468 (Musset et al., 2007). Yet this drug is widely and effectively used with proguanil as a  
469 combination drug under the trade name Malarone.

470

471 **Acknowledgements**

472 This study was supported by NIH grants [R01-AI097576 (T.J.C.A.), 1R01AI115691 and P50 AI  
473 098507 (P.T.L./P.J.H.)], World Health Organization [HQNTD1206356 (P.T.L.)], the UTHSCSA  
474 Presidents Collaborative Research Fund (P.T.L./P.J.H.) and the Robert A. Welch Foundation [AQ-  
475 1399 (P.J.H.)]. The molecular work at TBRI was conducted in facilities constructed with support  
476 from Research Facilities Improvement Program Grant (C06 RR013556) from the National Center  
477 for Research Resources (NIH). The AT&T Genomics Computing Center supercomputing facilities  
478 were supported by the AT&T Foundation and the National Center for Research Resources Grant  
479 (S10 RR029392). The *X-ray Crystallography Core Laboratory* is supported by the University of  
480 Texas Health Science Center, San Antonio, Office of the Vice President for Research and by the  
481 San Antonio Cancer Institute Grant (P30 CA054174). W.L. was supported by a Cowles fellowship  
482 from Texas Biomedical Research Institute. N.E. was supported by the City of San Antonio  
483 Summer Ambassador Program. R.R.A. received support from CNPq (168260/2014-0). G.O.  
484 received support from CNPq (309312/2012-4), CAPES (070/13, REDE 21/2015) and FAPEMIG  
485 (RED-00014-14, PPM-00439-10). ~~R.R.A. received support from CNPq (168260/2014-0).~~

486 We thank Guilherme Oliveira, Dr. Fernanda Ludolf Ribeiro, Maycon Bruno and Nilvande  
487 Ferreira for technical assistance during stool processing and miracidia sampling, Dr. Andrea  
488 Gazzinelli and Dr. Leonardo Matoso for stool sampling at Ponto dos Volantes, Dr. Ricardo  
489 Toshio Fujiwara at Universidade Federal de Minas Gerais and Dr. Rodrigo Corrêa-Oliveira at  
490 Centro de Pesquisas René Rachou for providing laboratory space for stool processing and  
491 miracidia sampling, and Joanne Curran for use of a capillary sequencer.

- 493 Anderson, T., Nkhoma, S., Ecker, A., Fidock, D., 2011. How can we identify parasite genes that  
494 underlie antimalarial drug resistance? *Pharmacogenomics* 12, 59–85.  
495 doi:10.2217/pgs.10.165
- 496 Artimo, P., Jonnalagedda, M., Arnold, K., Baratin, D., Csardi, G., de Castro, E., Duvaud, S., Flegel,  
497 V., Fortier, A., Gasteiger, E., Grosdidier, A., Hernandez, C., Ioannidis, V., Kuznetsov, D.,  
498 Liechti, R., Moretti, S., Mostaguir, K., Redaschi, N., Rossier, G., Xenarios, I., Stockinger,  
499 H., 2012. ExpASY: SIB bioinformatics resource portal. *Nucleic Acids Res* 40, W597–W603.  
500 doi:10.1093/nar/gks400
- 501 Ashley, E.A., Dhorda, M., Fairhurst, R.M., Amaratunga, C., Lim, P., Suon, S., Sreng, S., Anderson,  
502 J.M., Mao, S., Sam, B., Sopha, C., Chuor, C.M., Nguon, C., Sovannaroeth, S.,  
503 Pukrittayakamee, S., Jittamala, P., Chotivanich, K., Chutasmit, K., Suchatsoonthorn, C.,  
504 Runchaoren, R., Hien, T.T., Thuy-Nhien, N.T., Thanh, N.V., Phu, N.H., Htut, Y., Han, K.-T.,  
505 Aye, K.H., Mokuolu, O.A., Olaosebikan, R.R., Folaranmi, O.O., Mayxay, M., Khanthavong,  
506 M., Hongvanthong, B., Newton, P.N., Onyamboko, M.A., Fanello, C.I., Tshefu, A.K.,  
507 Mishra, N., Valecha, N., Phyto, A.P., Nosten, F., Yi, P., Tripura, R., Borrmann, S.,  
508 Bashraheil, M., Peshu, J., Faiz, M.A., Ghose, A., Hossain, M.A., Samad, R., Rahman, M.R.,  
509 Hasan, M.M., Islam, A., Miotto, O., Amato, R., MacInnis, B., Stalker, J., Kwiatkowski, D.P.,  
510 Bozdech, Z., Jeeyapant, A., Cheah, P.Y., Sakulthaew, T., Chalk, J., Intharabut, B., Silamut,  
511 K., Lee, S.J., Vihokhern, B., Kunasol, C., Imwong, M., Tarning, J., Taylor, W.J., Yeung, S.,  
512 Woodrow, C.J., Flegg, J.A., Das, D., Smith, J., Venkatesan, M., Plowe, C.V., Stepniewska,  
513 K., Guerin, P.J., Dondorp, A.M., Day, N.P., White, N.J., Tracking Resistance to Artemisinin  
514 Collaboration (T. R. A. C), 2014. Spread of artemisinin resistance in *Plasmodium*  
515 *falciparum* malaria. *N Engl J Med* 371, 411–423.
- 516 Bhembe, N.L., Nwodo, U.U., Govender, S., Hayes, C., Ndip, R.N., Okoh, A.I., Green, E., 2014.  
517 Molecular detection and characterization of resistant genes in *Mycobacterium*  
518 *tuberculosis* complex from DNA isolated from tuberculosis patients in the Eastern Cape  
519 province South Africa. *BMC Infect Dis* 14, 479. doi:10.1186/1471-2334-14-479
- 520 Chang, T.-H., Huang, H.-Y., Hsu, J.B.-K., Weng, S.-L., Horng, J.-T., Huang, H.-D., 2013. An  
521 enhanced computational platform for investigating the roles of regulatory RNA and for  
522 identifying functional RNA motifs. *BMC Bioinformatics* 14 Suppl 2, S4. doi:10.1186/1471-  
523 2105-14-S2-S4
- 524 Chaudhry, U., Redman, E.M., Raman, M., Gilleard, J.S., 2015. Genetic evidence for the spread of  
525 a benzimidazole resistance mutation across southern India from a single origin in the  
526 parasitic nematode *Haemonchus contortus*. *Int J Parasitol* 45, 721–728.  
527 doi:10.1016/j.ijpara.2015.04.007
- 528 Cheetham, P.S.J., 1994. Case studies in applied biocatalysis from ideas to products, in: Cabral,  
529 J.M.S., Best, D., Boross, L., Tramper, J. (Eds.), *Applied Biocatalysis*. Harwood Academics,  
530 pp. 47–108.
- 531 Cioli, D., Pica-Mattocchia, L., 1984. Genetic analysis of hycanthone resistance in *Schistosoma*  
532 *mansoni*. *Am J Trop Med Hyg* 33, 80–88.

533 Cioli, D., Pica-Mattocchia, L., Moroni, R., 1992. *Schistosoma mansoni*: hycanthone/oxamniquine  
534 resistance is controlled by a single autosomal recessive gene. *Exp Parasitol* 75, 425–432.  
535 doi:10.1016/0014-4894(92)90255-9

536 Colley, D.G., Bustinduy, A.L., Secor, W.E., King, C.H., 2014. Human schistosomiasis. *Lancet* 383,  
537 2253–2264. doi:10.1016/S0140-6736(13)61949-2

538 Coordinators, N.R., 2015. Database resources of the National Center for Biotechnology  
539 Information. *Nucleic Acids Res* 43, D6–17. doi:10.1093/nar/gku1130

540 Coura, J.R., Amaral, R.S., 2004. Epidemiological and control aspects of schistosomiasis in  
541 Brazilian endemic areas. *Mem Inst Oswaldo Cruz* 99, 13–19. doi:10.1590/S0074-  
542 02762004000900003

543 Coura, J.R., Conceição, M.J., 2010. Specific schistosomiasis treatment as a strategy for disease  
544 control. *Mem Inst Oswaldo Cruz* 105, 598–603.

545 Couto, F.F.B., Coelho, P.M.Z., Araújo, N., Kusel, J.R., Katz, N., Jannotti-Passos, L.K., Mattos,  
546 A.C.A., 2011. *Schistosoma mansoni*: a method for inducing resistance to praziquantel  
547 using infected *Biomphalaria glabrata* snails. *Mem Inst Oswaldo Cruz* 106, 153–157.  
548 doi:dx.doi.org/10.1590/S0074-02762011000200006

549 Djègbè, I., Agossa, F.R., Jones, C.M., Poupardin, R., Cornelie, S., Akogbéto, M., Ranson, H.,  
550 Corbel, V., 2014. Molecular characterization of DDT resistance in *Anopheles gambiae*  
551 from Benin. *Parasit Vectors* 7, 409. doi:10.1186/1756-3305-7-409

552 Dye, C., Mertens, T., Hirschall, G., Mpanju-Shumbusho, W., Newman, R.D., Raviglione, M.C.,  
553 Savioli, L., Nakatani, H., 2013. WHO and the future of disease control programmes.  
554 *Lancet* 381, 413–418. doi:10.1016/S0140-6736(12)61812-1

555 Egea, R., Casillas, S., Barbadilla, A., 2008. Standard and generalized McDonald-Kreitman test: a  
556 website to detect selection by comparing different classes of DNA sites. *Nucleic Acids*  
557 *Res* 36, W157–W162. doi:10.1093/nar/gkn337

558 Essandoh, J., Yawson, A.E., Weetman, D., 2013. Acetylcholinesterase (Ace-1) target site  
559 mutation 119S is strongly diagnostic of carbamate and organophosphate resistance in  
560 *Anopheles gambiae* s.s. and *Anopheles coluzzii* across southern Ghana. *Malar J* 12, 404.  
561 doi:10.1186/1475-2875-12-404

562 Jansma, W.B., Rogers, S.H., Liu, C.L., Bueding, E., 1977. Experimentally produced resistance of  
563 *Schistosoma mansoni* to hycanthone. *Am J Trop Med Hyg* 26, 926–936.

564 Katz, N., Dias, E.P., Araújo, N., Souza, C.P., 1973. Estudo de uma cepa humana de *Schistosoma*  
565 *mansoni* resistente a agentes esquistossomicidas. *Rev Soc Bras Med Trop* 7, 381 – 387.  
566 doi:10.1590/S0037-86821973000600008

567 Katz, N., Pellegrino, J., Ferreira, M.T., Oliveira, C.A., Dias, C.B., 1968. Preliminary clinical trials  
568 with hycanthone, a new antischistosomal agent. *Am J Trop Med Hyg* 17, 743–746.

569 Katz, N., Pellegrino, J., Grinbaum, E., Chaves, A., Zicker, F., 1973. Preliminary clinical trials with  
570 oxamniquine, a new antischistosomal agent. *Rev Inst Med Trop Sao Paulo* 15, 25–29.

571 Looareesuwan, S., Viravan, C., Webster, H.K., Kyle, D.E., Hutchinson, D.B., Canfield, C.J., 1996.  
572 Clinical studies of atovaquone, alone or in combination with other antimalarial drugs,  
573 for treatment of acute uncomplicated malaria in Thailand. *Am J Trop Med Hyg* 54, 62–  
574 66.

575 Melcher, K., 2000. A modular set of prokaryotic and eukaryotic expression vectors. *Anal*  
576 *Biochem* 277, 109–120. doi:10.1006/abio.1999.4383

577 Messer, P.W., Petrov, D.A., 2013. Population genomics of rapid adaptation by soft selective  
578 sweeps. *Trends Ecol Evol* 28, 659–669. doi:10.1016/j.tree.2013.08.003

579 Musset, L., Le Bras, J., Clain, J., 2007. Parallel evolution of adaptive mutations in *Plasmodium*  
580 *falciparum* mitochondrial DNA during atovaquone-proguanil treatment. *Mol Biol Evol*  
581 24, 1582–1585. doi:10.1093/molbev/msm087

582 Nei, M., Gojobori, T., 1986. Simple methods for estimating the numbers of synonymous and  
583 nonsynonymous nucleotide substitutions. *Mol Biol Evol* 3, 418–426.

584 Nickerson, D.A., Tobe, V.O., Taylor, S.L., 1997. PolyPhred: automating the detection and  
585 genotyping of single nucleotide substitutions using fluorescence-based resequencing.  
586 *Nucleic Acids Res* 25, 2745–2751.

587 Ogino, S., Gulley, M.L., den Dunnen, J.T., Wilson, R.B., Association for Molecular Pathology  
588 Training, Committe, E., 2007. Standard mutation nomenclature in molecular  
589 diagnostics: practical and educational challenges. *J Mol Diagn* 9, 1–6.

590 Panichsillapakit, T., Smith, D.M., Wertheim, J.O., Richman, D.D., Little, S.J., Mehta, S.R., 2015.  
591 Prevalence of transmitted HIV drug resistance among recently infected persons in San  
592 Diego, California 1996–2013. *J Acquir Immune Defic Syndr*.  
593 doi:10.1097/QAI.0000000000000831

594 Pearce, R.J., Pota, H., Evehe, M.-S.B., B<sup>a</sup>, E.-H., Mombo-Ngoma, G., Malisa, A.L., Ord, R.,  
595 Inojosa, W., Matondo, A., Diallo, D.A., Mbacham, W., van den Broek, I.V., Swarthout,  
596 T.D., Getachew, A., Dejene, S., Grobusch, M.P., Njie, F., Dunyo, S., Kweku, M., Owusu-  
597 Agyei, S., Chandramohan, D., Bonnet, M., Guthmann, J.-P., Clarke, S., Barnes, K.I., Streat,  
598 E., Katokele, S.T., Uusiku, P., Agboghoroma, C.O., Elegba, O.Y., Cissé, B., A-Elbasit, I.E.,  
599 Giha, H.A., Kachur, S.P., Lynch, C., Rwakimari, J.B., Chanda, P., Hawela, M., Sharp, B.,  
600 Naidoo, I., Roper, C., 2009. Multiple origins and regional dispersal of resistant dhps in  
601 African *Plasmodium falciparum* malaria. *PLoS Med* 6, e1000055.  
602 doi:10.1371/journal.pmed.1000055

603 Pica-Mattoccia, L., Archer, S., Cioli, D., 1992a. Hycanthone resistance in schistosomes correlates  
604 with the lack of an enzymatic activity which produces the covalent binding of  
605 hycanthone to parasite macromolecules. *Mol Biochem Parasitol* 55, 167–175.  
606 doi:10.1016/0166-6851(92)90137-9

607 Pica-Mattoccia, L., Carlini, D., Guidi, A., Cimica, V., Vigorosi, F., Cioli, D., 2006. The schistosome  
608 enzyme that activates oxamniquine has the characteristics of a sulfotransferase. *Mem*  
609 *Inst Oswaldo Cruz* 101 Suppl 1, 307–312. doi:10.1590/S0074-02762006000900048

610 Pica-Mattoccia, L., Cioli, D., Archer, S., 1989. Binding of oxamniquine to the DNA of  
611 schistosomes. *Trans R Soc Trop Med Hyg* 83, 373–376. doi:10.1016/0035-  
612 9203(89)90508-7

613 Pica-Mattoccia, L., Dias, L.C., Cioli, D., 1992b. Genetic complementation analysis of two  
614 independently isolated hycanthone-resistant strains of *Schistosoma mansoni*. *Mem Inst*  
615 *Oswaldo Cruz* 87 Suppl 4, 211–214. doi:10.1590/S0074-02761992000800032

616 Pica-Mattoccia, L., Dias, L.C., Moroni, R., Cioli, D., 1993. *Schistosoma mansoni*: genetic  
617 complementation analysis shows that two independent hycanthone/oxamniquine-  
618 resistant strains are mutated in the same gene. *Exp Parasitol* 77, 445–449.  
619 doi:10.1006/expr.1993.1104

620 R Core Team, 2015. R: A Language and Environment for Statistical Computing. R Foundation for  
621 Statistical Computing, Vienna, Austria.

622 Redman, E., Whitelaw, F., Tait, A., Burgess, C., Bartley, Y., Skuce, P.J., Jackson, F., Gilleard, J.S.,  
623 2015. The emergence of resistance to the benzimidazole anthelmintics in parasitic  
624 nematodes of livestock is characterised by multiple independent hard and soft selective  
625 sweeps. *PLoS Negl Trop Dis* 9, e0003494. doi:10.1371/journal.pntd.0003494

626 Rousset, F., 2008. genepop'007: a complete re-implementation of the genepop software for  
627 Windows and Linux. *Mol Ecol Resour* 8, 103–106. doi:10.1111/j.1471-  
628 8286.2007.01931.x

629 Rufener, L., Mäser, P., Roditi, I., Kaminsky, R., 2009. *Haemonchus contortus* acetylcholine  
630 receptors of the DEG-3 subfamily and their role in sensitivity to monepantel. *PLoS*  
631 *Pathog* 5, e1000380. doi:10.1371/journal.ppat.1000380

632 Steinmann, P., Keiser, J., Bos, R., Tanner, M., Utzinger, J., 2006. Schistosomiasis and water  
633 resources development: systematic review, meta-analysis, and estimates of people at  
634 risk. *Lancet Infect Dis* 6, 411–425. doi:10.1016/S1473-3099(06)70521-7

635 Taylor, A.B., Pica-Mattocchia, L., Polcaro, C.M., Donati, E., Cao, X., Basso, A., Guidi, A., Rugel, A.R.,  
636 Holloway, S.P., Anderson, T.J.C., Hart, P.J., Cioli, D., LoVerde, P.T., 2015. Structural and  
637 functional characterization of the enantiomers of the antischistosomal drug  
638 oxamniquine. *PLoS Negl Trop Dis* 9, e0004132. doi:10.1371/journal.pntd.0004132

639 Utzinger, J., Keiser, J., Shuhua, X., Tanner, M., Singer, B.H., 2003. Combination chemotherapy of  
640 schistosomiasis in laboratory studies and clinical trials. *Antimicrob Agents Chemother*  
641 47, 1487–1495. doi:10.1128/AAC.47.5.1487-1495.2003

642 Valentim, C.L.L., Cioli, D., Chevalier, F.D., Cao, X., Taylor, A.B., Holloway, S.P., Pica-Mattocchia, L.,  
643 Guidi, A., Basso, A., Tsai, I.J., Berriman, M., Carvalho-Queiroz, C., Almeida, M., Aguilar,  
644 H., Frantz, D.E., Hart, P.J., LoVerde, P.T., Anderson, T.J.C., 2013. Genetic and molecular  
645 basis of drug resistance and species-specific drug action in Schistosome parasites.  
646 *Science* 342, 1385–1389. doi:10.1126/science.1243106

647

648 ~~Anderson, T., Nkhoma, S., Ecker, A., Fidock, D., Jan 2011. How can we identify parasite genes~~  
649 ~~that underlie antimalarial drug resistance? *Pharmacogenomics* 12 (1), 59–85.~~

650 ~~Artimo, P., Jonnalagedda, M., Arnold, K., Baratin, D., Csardi, G., de Castro, E., Duvaud, S., Flegel,~~  
651 ~~V., Fortier, A., Gasteiger, E., Grosdidier, A., Hernandez, C., Ioannidis, V., Kuznetsov, D., Liechti,~~  
652 ~~R., Moretti, S., Mostaguir, K., Redaschi, N., Rossier, G., Xenarios, I., Stockinger, H., Jul 2012.~~  
653 ~~Expasy: Sib bioinformatics resource portal. *Nucleic Acids Res.* 40 (Web Server issue), W597–~~  
654 ~~W603.~~

655 ~~Ashley, E. A., Dhorda, M., Fairhurst, R. M., Amaratunga, C., Lim, P., Suon, S., Sreng, S., Anderson,~~  
656 ~~J. M., Mao, S., Sam, B., Sopha, C., Chuor, C. M., Nguon, C., Sovannaroeth, S., Pukrittayakamee, S.,~~  
657 ~~Jittamala, P., Chotivanich, K., Chutasmit, K., Suchatsoonthorn, C., Runchaoren, R., Hien, T. T.,~~  
658 ~~Thuy-Nhien, N. T., Thanh, N. V., Phu, N. H., Htut, Y., Han, K. T., Aye, K. H., Mokuolu, O. A.,~~  
659 ~~Olaosebikan, R. R., Folaranmi, O. O., Mayxay, M., Khanthavong, M., Hongvanthong, B., Newton,~~

660 P. N., Onyamboko, M. A., Fanello, C. I., Tshefu, A. K., Mishra, N., Valecha, N., Phyo, A. P.,  
661 Nosten, F., Yi, P., Tripura, R., Borrmann, S., Bashraheil, M., Peshu, J., Faiz, M. A., Ghose, A.,  
662 Hossain, M. A., Samad, R., Rahman, M. R., Hasan, M. M., Islam, A., Miotto, O., Amato, R.,  
663 MacInnis, B., Stalker, J., Kwiatkowski, D. P., Bozdech, Z., Jeeyapant, A., Cheah, P. Y., Sakulthaew,  
664 T., Chalk, J., Intharabut, B., Silamut, K., Lee, S. J., Vihokhern, B., Kunasol, C., Imwong, M.,  
665 Tarning, J., Taylor, W. J., Yeung, S., Woodrow, C. J., Flegg, J. A., Das, D., Smith, J., Venkatesan,  
666 M., Plowe, C. V., Stepniewska, K., Guerin, P. J., Dondorp, A. M., Day, N. P., White, N. J., Tracking  
667 Resistance to Artemisinin Collaboration (T. R. A. C), Jul 2014. Spread of artemisinin resistance in  
668 *Plasmodium falciparum* malaria. *N. Engl. J. Med.* 371 (5), 411–423.

669 Bhembe, N. L., Nwodo, U. U., Govender, S., Hayes, C., Ndip, R. N., Okoh, A. I., Green, E., 2014.  
670 Molecular detection and characterization of resistant genes in *Mycobacterium tuberculosis*  
671 complex from DNA isolated from tuberculosis patients in the Eastern Cape province South  
672 Africa. *BMC Infect. Dis.* 14, 479.

673 Chang, T. H., Huang, H. Y., Hsu, J. B. K., Weng, S. L., Horng, J. T., Huang, H. D., 2013. An  
674 enhanced computational platform for investigating the roles of regulatory RNA and for  
675 identifying functional RNA motifs. *BMC Bioinformatics* 14 Suppl 2, S4.

676 Chaudhry, U., Redman, E. M., Raman, M., Gilleard, J. S., Sep 2015. Genetic evidence for the  
677 spread of a benzimidazole resistance mutation across southern India from a single origin in the  
678 parasitic nematode *Haemonchus contortus*. *Int. J. Parasitol.* 45 (11), 721–728.

679 Cioli, D., Pica-Mattoccia, L., Jan 1984. Genetic analysis of hycanthone resistance in *Schistosoma*  
680 *mansoni*. *Am. J. Trop. Med. Hyg.* 33 (1), 80–88.

681 Cioli, D., Pica-Mattoccia, L., Moroni, R., Dec 1992. *Schistosoma mansoni*:  
682 hycanthone/oxamniquine resistance is controlled by a single autosomal recessive gene. *Exp.*  
683 *Parasitol.* 75 (4), 425–432.

684 Colley, D. G., Bustinduy, A. L., Secor, W. E., King, C. H., Jun 2014. Human schistosomiasis. *Lancet*  
685 383 (9936), 2253–2264.

686 Coura, J. R., Amaral, R. S., 2004. Epidemiological and control aspects of schistosomiasis in  
687 Brazilian endemic areas. *Mem. Inst. Oswaldo Cruz* 99 (5 Suppl 1), 13–19.

688 Coura, J. R., Conceição, M. J., Jul 2010. Specific schistosomiasis treatment as a strategy for  
689 disease control. *Mem. Inst. Oswaldo Cruz* 105 (4), 598–603.

690 Couto, F. F. B., Coelho, P. M. Z., Araújo, N., Kusel, J. R., Katz, N., Jannotti-Passos, L. K., Mattos, A.  
691 C. A., Mar 2011. *Schistosoma mansoni*: a method for inducing resistance to praziquantel using  
692 infected *Biomphalaria glabrata* snails. *Mem. Inst. Oswaldo Cruz* 106 (2), 153–157.



693 ~~Djègbè, I., Agossa, F. R., Jones, C. M., Poupardin, R., Cornelie, S., Akogbéto, M., Ranson, H.,~~  
694 ~~Corbel, V., 2014. Molecular characterization of DDT resistance in *Anopheles gambiae* from~~  
695 ~~Benin. *Parasit Vectors* 7, 409.~~

696 ~~Egea, R., Casillas, S., Barbadilla, A., Jul 2008. Standard and generalized McDonald–Kreitman test:~~  
697 ~~a website to detect selection by comparing different classes of DNA sites. *Nucleic Acids Res.*~~  
698 ~~36 (Web Server issue), W157–W162.~~

699 ~~Essandoh, J., Yawson, A. E., Weetman, D., 2013. Acetylcholinesterase (Ace-1) target site~~  
700 ~~mutation 119S is strongly diagnostic of carbamate and organophosphate resistance in~~  
701 ~~*Anopheles gambiae* s.s. and *Anopheles coluzzii* across southern Ghana. *Malar. J.* 12, 404.~~

702 ~~Jansma, W. B., Rogers, S. H., Liu, C. L., Bueding, E., Sep 1977. Experimentally produced~~  
703 ~~resistance of *Schistosoma mansoni* to hycanthone. *Am. J. Trop. Med. Hyg.* 26 (5 Pt 1), 926–936.~~

704 ~~Katz, N., Dias, E. P., Araña, N., Souza, C. P., 12 1973. Estudo de uma cepa humana de *Schistosoma*~~  
705 ~~*mansoni* resistente a agentes esquistossomicidas. *Revista da Sociedade Brasileira de Medicina*~~  
706 ~~*Tropical* 7 (6), 381–387.~~

707 ~~Katz, N., Pellegrino, J., Ferreira, M. T., Oliveira, C. A., Dias, C. B., Sep 1968. Preliminary clinical~~  
708 ~~trials with hycanthone, a new antischistosomal agent. *Am. J. Trop. Med. Hyg.* 17 (5), 743–746.~~

709 ~~Katz, N., Pellegrino, J., Grinbaum, E., Chaves, A., Zicker, F., 1973. Preliminary clinical trials with~~  
710 ~~oxamniquine, a new antischistosomal agent. *Rev. Inst. Med. Trop. Sao Paulo* 15 (1), 25–29.~~

711 ~~Looareesuwan, S., Viravan, C., Webster, H. K., Kyle, D. E., Hutchinson, D. B., Canfield, C. J., Jan~~  
712 ~~1996. Clinical studies of atovaquone, alone or in combination with other antimalarial drugs, for~~  
713 ~~treatment of acute uncomplicated malaria in Thailand. *Am. J. Trop. Med. Hyg.* 54 (1), 62–66.~~

714 ~~Melcher, K., Jan 2000. A modular set of prokaryotic and eukaryotic expression vectors. *Anal.*~~  
715 ~~*Biochem.* 277 (1), 109–120.~~

716 ~~Messer, P. W., Petrov, D. A., Nov 2013. Population genomics of rapid adaptation by soft~~  
717 ~~selective sweeps. *Trends Ecol Evol* 28 (11), 659–669.~~

718 ~~Musset, L., Le Bras, J., Clain, J., Aug 2007. Parallel evolution of adaptive mutations in~~  
719 ~~*Plasmodium falciparum* mitochondrial DNA during atovaquone-proguanil treatment. *Mol. Biol.*~~  
720 ~~*Evol.* 24 (8), 1582–1585.~~

721 ~~NCBI Resource Coordinators, Jan 2015. Database resources of the National Center for~~  
722 ~~Biotechnology Information. *Nucleic Acids Res.* 43 (Database issue), D6–17.~~

723 ~~Nei, M., Gojobori, T., Sep 1986. Simple methods for estimating the numbers of synonymous and~~  
724 ~~nonsynonymous nucleotide substitutions. Mol. Biol. Evol. 3 (5), 418–426.~~

725 ~~Nickerson, D. A., Tobe, V. O., Taylor, S. L., Jul 1997. PolyPhred: automating the detection and~~  
726 ~~genotyping of single nucleotide substitutions using fluorescence based resequencing. Nucleic~~  
727 ~~Acids Res. 25 (14), 2745–2751.~~

728 ~~Ogino, S., Gulley, M. L., den Dunnen, J. T., Wilson, R. B., A. f. M. P. T., Committttee, E., Feb~~  
729 ~~2007. Standard mutation nomenclature in molecular diagnostics: practical and educational~~  
730 ~~challenges. J. Mol. Diagn. 9 (1), 1–6.~~

731 ~~Panichsillapakit, T., Smith, D. M., Wertheim, J. O., Richman, D. D., Little, S. J., Mehta, S. R., Sep~~  
732 ~~2015. Prevalence of transmitted HIV drug resistance among recently infected persons in San~~  
733 ~~Diego, California 1996–2013. J. Acquir. Immune Defic. Syndr.~~

734 ~~Pearce, R. J., Pota, H., Evehe, M. S. B., Bâ, E. H., Mombo-Ngoma, G., Malisa, A. L., Ord, R.,~~  
735 ~~Inojosa, W., Matondo, A., Diallo, D. A., Mbacham, W., van den Broek, I. V., Swarthout, T. D.,~~  
736 ~~Getachew, A., Dejene, S., Grobusch, M. P., Njie, F., Dunyo, S., Kweku, M., Owusu-Agyei, S.,~~  
737 ~~Chandramohan, D., Bonnet, M., Guthmann, J. P., Clarke, S., Barnes, K. I., Streat, E., Katokele,~~  
738 ~~S. T., Uusiku, P., Agboghoroma, C. O., Elegba, O. Y., Cissé, B., A-Elbasit, I. E., Giha, H. A., Kachur,~~  
739 ~~S. P., Lynch, C., Rwakimari, J. B., Chanda, P., Hawela, M., Sharp, B., Naidoo, I., Roper, C., Apr~~  
740 ~~2009. Multiple origins and regional dispersal of resistant dhps in african *Plasmodium falciparum*~~  
741 ~~malaria. PLoS Med. 6 (4), e1000055.~~

742 ~~Pica-Mattoccia, L., Archer, S., Cioli, D., Oct 1992. Hycanthon resistance in schistosomes~~  
743 ~~correlates with the lack of an enzymatic activity which produces the covalent binding of~~  
744 ~~hycanthon to parasite macromolecules. Mol. Biochem. Parasitol. 55 (1-2), 167–175.~~

745 ~~Pica-Mattoccia, L., Carlini, D., Guidi, A., Cimica, V., Vigorosi, F., Cioli, D., Sep 2006. The~~  
746 ~~schistosome enzyme that activates oxamniquine has the characteristics of a sulfotransferase.~~  
747 ~~Mem. Inst. Oswaldo Cruz 101 Suppl 1, 307–312.~~

748 ~~Pica-Mattoccia, L., Cioli, D., Archer, S., 1989. Binding of oxamniquine to the DNA of~~  
749 ~~schistosomes. Trans. R. Soc. Trop. Med. Hyg. 83 (3), 373–376.~~

750 ~~Pica-Mattoccia, L., Dias, L. C., Cioli, D., 1992. Genetic complementation analysis of two~~  
751 ~~independently isolated hycanthon resistant strains of *Schistosoma mansoni*. Mem. Inst.~~  
752 ~~Oswaldo Cruz 87 Suppl 4, 211–214.~~

753 ~~Pica-Mattoccia, L., Dias, L. C., Moroni, R., Cioli, D., Dec 1993. *Schistosoma mansoni*: genetic~~  
754 ~~complementation analysis shows that two independent hycanthon/oxamniquine resistant~~  
755 ~~strains are mutated in the same gene. Exp. Parasitol. 77 (4), 445–449.~~

756 ~~R Core Team, 2015. R: A Language and Environment for Statistical Computing. R Foundation for~~  
757 ~~Statistical Computing, Vienna, Austria, 3-900051-07-0.~~

758 ~~Redman, E., Whitelaw, F., Tait, A., Burgess, C., Bartley, Y., Skuce, P. J., Jackson, F., Gilleard, J. S.,~~  
759 ~~Feb 2015. The emergence of resistance to the benzimidazole anthelmintics in parasitic~~  
760 ~~nematodes of livestock is characterised by multiple independent hard and soft selective~~  
761 ~~sweeps. PLoS Negl Trop Dis 9 (2), e0003494.~~

762 ~~Rousset, F., Jan 2008. genepop'007: a complete re-implementation of the genepop software for~~  
763 ~~windows and linux. Mol Ecol Resour 8 (1), 103-106.~~

764 ~~Steinmann, P., Keiser, J., Bos, R., Tanner, M., Utzinger, J., Jul 2006. Schistosomiasis and water~~  
765 ~~resources development: systematic review, meta-analysis, and estimates of people at risk.~~  
766 ~~Lancet Infect. Dis. 6 (7), 411-425.~~

767 ~~Taylor, A. B., Pica-Mattoccia, L., Polcaro, C. M., Donati, E., Cao, X., Basso, A., Guidi, A., Rugel,~~  
768 ~~A. R., Holloway, S. P., Anderson, T. J. C., Hart, P. J., Cioli, D., LoVerde, P. T., Oct 2015. Structural~~  
769 ~~and functional characterization of the enantiomers of the antischistosomal drug oxamniquine.~~  
770 ~~PLoS Negl Trop Dis 9 (10), e0004132.~~

771 ~~Utzinger, J., Keiser, J., Shuhua, X., Tanner, M., Singer, B. H., May 2003. Combination~~  
772 ~~chemotherapy of schistosomiasis in laboratory studies and clinical trials. Antimicrob. Agents~~  
773 ~~Chemother. 47 (5), 1487-1495.~~

774 ~~Valentim, C. L., Cioli, D., Chevalier, F. D., Cao, X., Taylor, A. B., Holloway, S. P., Pica-Mattoccia, L.,~~  
775 ~~Guidi, A., Basso, A., Tsai, I. J., Berriman, M., Carvalho-Queiroz, C., Almeida, M., Aguilar, H.,~~  
776 ~~Frantz, D. E., Hart, P. J., LoVerde, P. T., Anderson, T. J., 2013. Genetic and molecular basis of~~  
777 ~~drug resistance and species-specific drug action in schistosome parasites. Science 342 (6164),~~  
778 ~~1385-1389.~~

779 ~~World Health Organization, 2013. Schistosomiasis: progress report 2001-2011, strategic plan~~  
780 ~~2012-2020. WHO Press, World Health Organization, 20 Avenue Appia, 1211 Geneva 27,~~  
781 ~~Switzerland.~~

782 **Figures**

783

784 **Fig. 1 – Mapping of the mutations on the gene sequence and structure of SmSULT-OR.** Exon 1 and exon  
785 2 are represented in orange and beige, respectively. Single nucleotide polymorphisms and  
786 insertion/deletion events are represented in cyan and magenta, respectively. Loss-of-function mutations  
787 are highlighted in black. **(A)** Linear representation of the *SmSULT-OR* gene showing the relative position  
788 of the mutations and their translation in amino acid sequences. **(B)** Positions of mutations on the  
789 SmSULT-OR protein. OXA is represented in yellow, PAPS co-factor is represented in green, and spatial  
790 distortion are represented by red discs. For a more detail view of the mutations on the structure and  
791 their functional impact, see supplementary video.

792

793 **Fig. 2 – Enzymatic activity of recombinant SmSULT-OR expressed from different allelic variants.** This *in*  
794 *vitro* OXA activation assay quantifies DNA-OXA complexes by scintillation (~~count~~counts per minutes)  
795 (see section 2.9). Bars showed the mean of three replicates, while error bars are standard errors.  
796 Enzyme carrying loss-of-function mutations, such as p.C35 or p.E142del, show no OXA activation, while  
797 two newly identified alleles (p.G206V and p.N215Y) do not impair OXA activation. \*  $p < 0.05$ .

798 **Tables**799 **Table 1 – Primer sequences used for PCR and sequencing of the two exons of the *SmSULT-OR* gene.**

|        | Primer type               | Primer sequence (5' to 3' orientation) | Expected amplicon size (bp) | Usage              |
|--------|---------------------------|----------------------------------------|-----------------------------|--------------------|
| Exon 1 | Outer forward primer      | GCGAGATTCAAACCCAGGAT                   | 822                         | PCR                |
|        | Outer reverse primer      | GCCGTGATATTACTATCAATCCC                |                             | PCR                |
|        | Nested forward primer     | GGGTAAAGGAAGAGGGTTGG                   | 545                         | PCR                |
|        | Nested reverse primer     | TAAGAACAGACATATTAGACGAGT               |                             | PCR and sequencing |
|        | Sequencing forward primer | TATATATGAAATATTATAACATTAC              | -                           | sequencing         |
| Exon 2 | Forward primer            | ACTTCAACCAATCCACAAATCC                 | 672                         | PCR and sequencing |
|        | Reverse primer            | AGTCCATTCAATGTTTCAA                    |                             | PCR and sequencing |

800

801 **Table 2 – Mutations scored in the exons and 3' UTR of the *SmSULT-OR* gene.** For each mutation, the corresponding nucleotide found in  
802 *Schistosoma rodhaini*, the number of homozygous and heterozygous samples, the number of ~~samples~~ samples sequenced (sample size), the allele  
803 frequency of the ~~alternative~~ non-reference allele, the corresponding amino acid mutation, and the functional impacts are shown. The code used  
804 for nucleic mutations indicate the sequence type (c = coding, g = gene), the position, and the mutation type (X>Y = substitution of X by Y,  
805 insN = insertion of N, delN = deletion of N). The code used for protein mutations are coded with the sequence type (p = protein), the reference  
806 amino acid, the position, and finally the alternative amino acid, and when frame shift (fs) occurs, the position of the stop codon (X) after the  
807 mutation. For details about the nomenclature, see Ogino et al., 2007.

|        | Nucleic mutation | <i>Schistosoma rodhaini</i> state | Number of homozygous samples for non-ref. allele | Number of heterozygous samples for non-ref. allele | Sample size | Frequency of the alt. allele | Amino acid mutation | Functional impacts                        |
|--------|------------------|-----------------------------------|--------------------------------------------------|----------------------------------------------------|-------------|------------------------------|---------------------|-------------------------------------------|
| Exon 1 | c.103T>C         | T                                 | 0                                                | 1                                                  | 183         | 0.0027                       | p.C35R              | Misfolded protein (Valentim et al., 2013) |

|        |                 |   |     |    |     |        |             |                                                                          |
|--------|-----------------|---|-----|----|-----|--------|-------------|--------------------------------------------------------------------------|
|        | c.200C>T        | C | 169 | 12 | 183 | 0.9563 | p.P67L      | No effect (Valentim et al., 2013)                                        |
|        | c.214_215insA   | - | 0   | 1  | 183 | 0.0027 | p.T72NfsX5  | Truncated protein with no active site                                    |
| Intron | g.328G>A        | G | 1   | 0  | 179 | 0.0056 | p.V110IfsX3 | Splicing site disrupted leading to truncated protein with no active site |
| Exon 2 | c.424_426delGAA | - | 1   | 1  | 188 | 0.0080 | p.E142del   | Impaired oxamniquine binding (Valentim et al., 2013)                     |
|        | c.617G>T        | G | 1   | 0  | 188 | 0.0053 | p.G206V     | No effect (Fig. 2)                                                       |
|        | c.643A>T        | A | 0   | 1  | 188 | 0.0027 | p.N215Y     | No effect (Fig. 2)                                                       |
| 3' UTR | g.4720C>T       | C | 177 | 9  | 188 | 0.9654 | -           | -                                                                        |
|        | g.4741T>C       | T | 2   | 8  | 188 | 0.0319 | -           | -                                                                        |

809 **Supplementary material**

810

811 **Supp. fig. 1**

812

813 **Fig. S1** – Map of South America showing the places of origin of known and new OXA resistance alleles. Mutation p.C35R was identified in São  
814 Paulo state (SP) while p.E142del was identified in Puerto Rico (PR). Both locations are distant from our sample site in Minas Gerais state (MG;  
815 ~500 km and ~3,000 km, respectively).

816 **Supp. table 1****Table S1** – Sample summary and genotype details for each sample.

817 **Supp. movie****Movie S1** – Impact of mutation on SmsULT-OR structure and function. This video details the mutations and potential impact on  
818 the protein structure and enzyme activity.

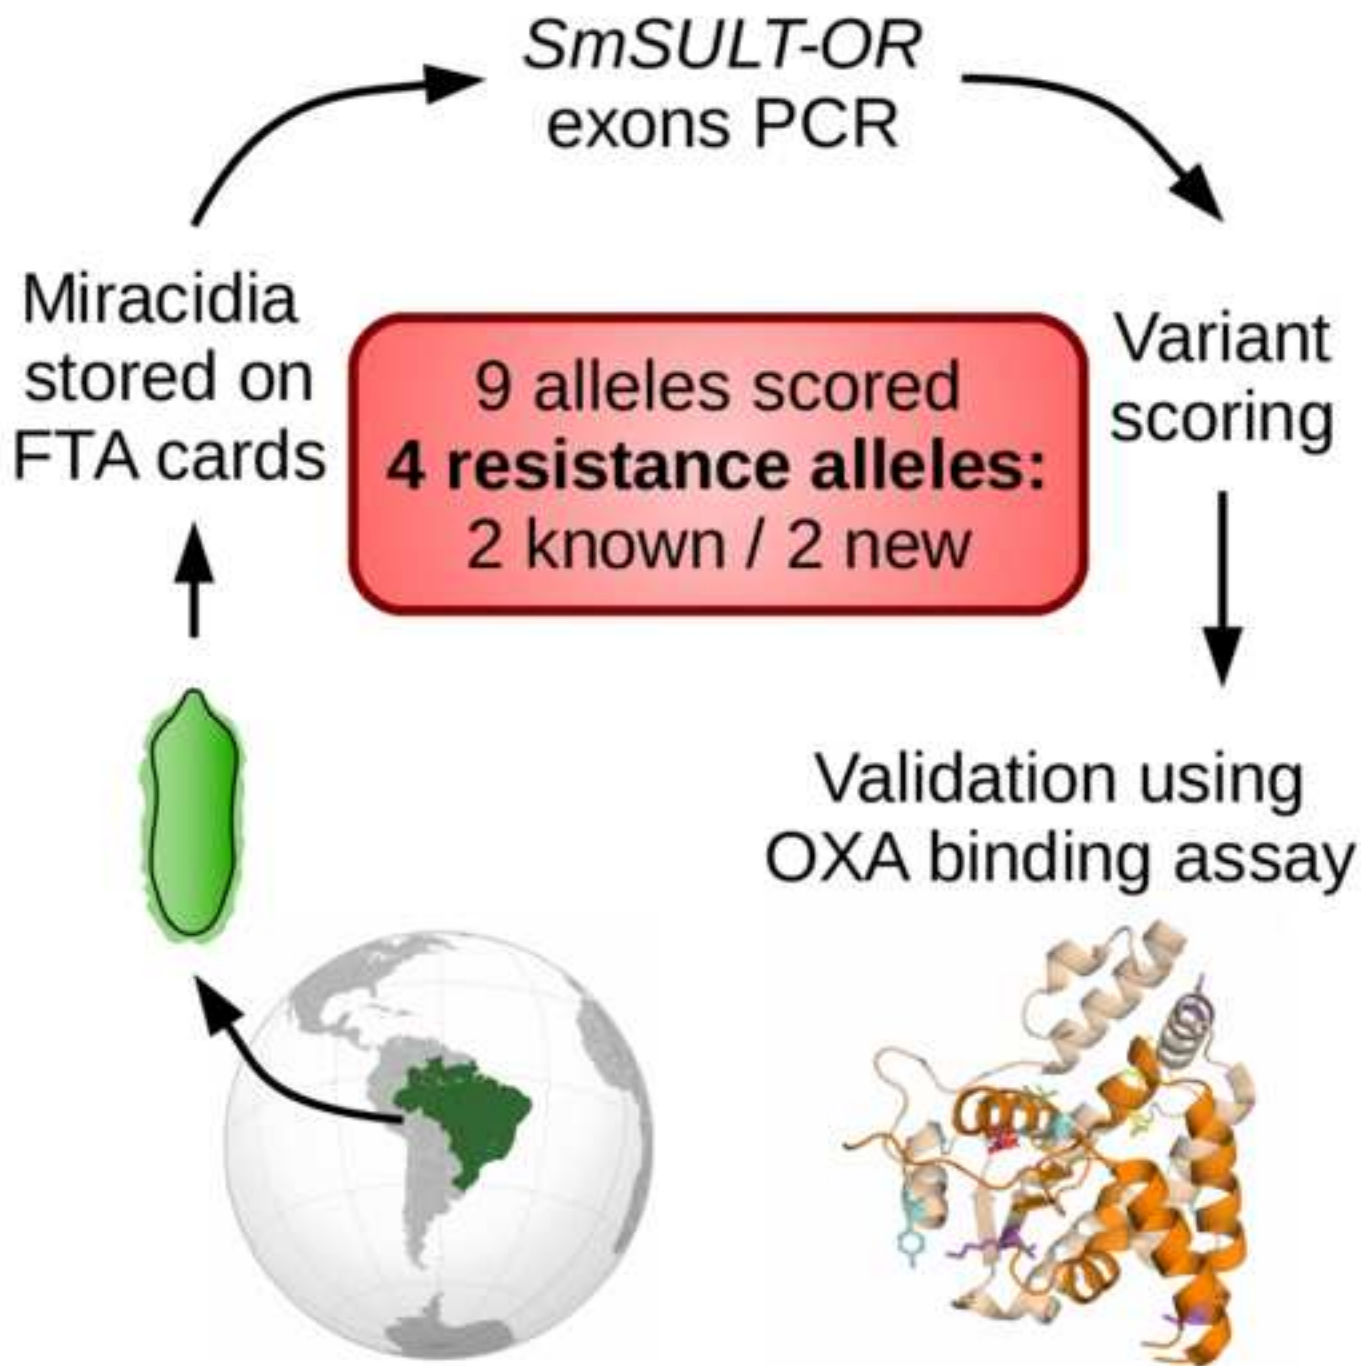



**Highlights:**

- We surveyed allelic variation in a schistosome drug resistance gene
- There were four independent origins of alleles encoding loss-of-function proteins
- Resistance mutations are at a very low frequency ( $< 0.0080$ )
- Loss-of-function mutations were tested using an in vitro oxamniquine activation assay

1        **Independent origins of loss-of-function mutations conferring**  
2                    **oxamniquine resistance in a Brazilian schistosome**  
3                                    **population☆**

4  
5        Frédéric D. Chevalier<sup>a,\*</sup>, Winka Le Clec'h<sup>a</sup>, Nina Eng<sup>a</sup>, Anastasia R. Rugel<sup>b</sup>, Rafael Ramiro de  
6        Assis<sup>c</sup>, Guilherme Oliveira<sup>c,d</sup>, Stephen P. Holloway<sup>b</sup>, Xiaohang Cao<sup>b</sup>, P. John Hart<sup>b,e</sup>, Philip T.  
7        LoVerde<sup>b</sup>, Timothy J.C. Anderson<sup>a,\*</sup>

8  
9        <sup>a</sup>*Texas Biomedical Research Institute, Department of Genetics, P.O. Box 760549, 78245-0549*  
10        *San Antonio, Texas, USA*

11        <sup>b</sup>*Departments of Biochemistry and Pathology, University of Texas Health Science Center, San*  
12        *Antonio, Texas, 78229-3900, USA*

13        <sup>c</sup>*Centro de Pesquisas René Rachou, Fundação Oswaldo Cruz, Av. Augusto de Lima, 1715, Belo*  
14        *Horizonte, Minas Gerais, 30190-002, Brazil*

15        <sup>d</sup>*Vale Institute of Technology, Rua Boaventura da Silva, 955, Belém, Pará, 66055-090, Brazil*

16        <sup>e</sup>*Department of Veterans Affairs, South Texas Veterans Health Care System, San Antonio, TX*  
17        *78229, USA*

18        **\*Corresponding authors.** Frédéric D. Chevalier and Timothy J.C. Anderson

19        *E-mail addresses:* [fcheval@txbiomed.org](mailto:fcheval@txbiomed.org) and [tanderso@txbiomed.org](mailto:tanderso@txbiomed.org)

20  
21        ☆Note: Nucleotide sequence data reported in this paper are available in the GenBank™, EMBL  
22        and DDBJ databases under the accession numbers **KU951903 - KU952091**

23        Note: Supplementary data associated with this article

24 **Abstract**

25 Molecular surveillance provides a powerful approach to monitoring the resistance status of  
26 parasite populations in the field and for understanding resistance evolution. Oxamniquine  
27 (OXA) was used to treat Brazilian schistosomiasis patients (mid-1970s to mid-2000s) and several  
28 cases of parasite infections resistant to treatment were recorded. The gene underlying  
29 resistance (*SmSULT-OR*) encodes a sulfotransferase required for intracellular drug activation.  
30 Resistance has a recessive basis and occurs when both *SmSULT-OR* alleles encode for defective  
31 proteins. Here we examine *SmSULT-OR* sequence variation in a natural schistosome population  
32 in Brazil ~40 years after the first use of this drug. We sequenced *SmSULT-OR* from 189  
33 individual miracidia (1-11 per patient) recovered from 49 patients, and tested proteins  
34 expressed from putative resistance alleles for their ability to activate OXA. We found nine  
35 mutations (four non-synonymous single nucleotide polymorphisms (SNPs), three non-coding  
36 SNPs and two indels). Both mutations (p.E142del and p.C35R) identified previously were  
37 recovered in this field population. We also found two additional mutations (a splice site variant  
38 and 1 bp coding insertion) predicted to encode non-functional truncated proteins. Two  
39 additional substitutions (p.G206V, p.N215Y) tested had no impact on OXA activation. Three  
40 results are of particular interest: (i) we recovered the p.E142del mutation from the field: this  
41 same deletion is responsible for resistance in an OXA-selected laboratory parasite population;  
42 (ii) frequencies of resistance alleles are extremely low (0.27-0.8%), perhaps due to fitness costs  
43 associated with carriage of these alleles; (iii) that four independent resistant alleles were found  
44 is consistent with the idea that multiple mutations can generate loss-of-function alleles.

45

46 *Keywords:* *Schistosoma mansoni*, Oxamniquine resistance, Sulfotransferase, Loss-of-function,  
47 Biochemical assay, Soft selective event

48

## 49 1. Introduction

50 Surveys of drug resistance alleles using molecular markers provide a powerful approach  
51 to identify pathogen populations in which resistance is emerging, to map resistance spread, and  
52 for evidence-based resistance management. Molecular approaches are now widely used for  
53 tracking resistance in malaria (Pearce et al., 2009; Ashley et al., 2014), HIV (Panichsillapakit et  
54 al., 2015) and bacterial diseases (Bhembe et al., 2014), and for managing insecticide resistance (  
55 Essandoh et al., 2013; Djègbè et al., 2014). Such methods are also now actively used for  
56 monitoring resistance in helminths of veterinary importance such as *Haemonchus contortus* (  
57 Rufener et al., 2009; Chaudhry et al., 2015; Redman et al., 2015), and have enormous potential  
58 for monitoring resistance in helminth parasites infecting humans, because existing phenotypic  
59 screening methods based on reductions in production of eggs or larval stages are insensitive for  
60 detection of low frequency resistance alleles and cannot detect recessive resistance alleles  
61 present in heterozygous worms. However, molecular surveillance is only possible when  
62 resistance genes have been identified, which is rarely the case for human helminth infections  
63 such as schistosomiasis.

64 Schistosomiasis, caused by three major species of blood flukes of the genus *Schistosoma*  
65 (Dye et al., 2013; Colley et al., 2014), is the second most important tropical parasitic disease  
66 after malaria (Steinmann et al., 2006), affecting an estimated 260 million people across Africa,  
67 Asia and South America, and killing over 200,000 people per year. Two drugs are available for  
68 treating schistosomiasis. Praziquantel (PZQ) is currently used as a monotherapy in expanding  
69 mass drug administration programs in Africa (Dye et al., 2013), making resistance evolution a  
70 major concern. A second drug, oxamniquine (OXA), is the focus of this paper. OXA acts  
71 specifically against *Schistosoma mansoni*, which is found in Africa, together with  
72 *Schistosoma haematobium*, and in South America, where it is the only species present. OXA was  
73 manufactured in Brazil by Pfizer (Cheetham, 1994) and widely used to treat *S. mansoni*  
74 infections from the mid-1970s to the mid-2000s (Coura and Amaral, 2004), but has now been  
75 replaced by PZQ as the first line drug.

76 Schistosomes resistant to OXA were first identified in Brazil in 1973 (Naftale Katz et al.,  
77 1973), around the same time as the first clinical study of OXA treatment (Katz et al., 1973). This  
78 rapid emergence of resistance was most likely due to the previous treatment of the same  
79 populations with the related drug hycanthone (Katz et al., 1968; Coura and Conceição, 2010), as  
80 both OXA and hycanthone have the same target (Jansma et al., 1977; Pica-Mattoccia et al.,  
81 1993) and the same mechanism of resistance (Pica-Mattoccia et al., 1992a). Later genetic  
82 studies showed that resistance is a recessive single locus trait (Cioli and Pica-Mattoccia, 1984;  
83 Pica-Mattoccia et al., 1993), most likely involving the absence of a sulfotransferase activity  
84 necessary for drug activation in resistant schistosomes (Pica-Mattoccia et al., 2006). The gene

85 encoding the *S. mansoni* sulfotransferase involved in OXA resistance (*SmSULT-OR*) was recently  
86 identified by classical quantitative trait mapping in concert with crystallographic and functional  
87 analyses (Valentim et al., 2013). This work identified an amino acid deletion (p.E142del) in the  
88 laboratory-selected resistant parasite (HR), while an independent loss-of-function mutation  
89 (p.C35R) was identified in a field-collected resistant parasite line (MAP).

90 The identification of the gene involved in OXA resistance now allows us to examine  
91 distribution of resistance alleles of *SmSULT-OR* in natural populations. Despite the fact that the  
92 Brazilian government has switched from OXA to PZQ during the last decade (Utzinger et al.,  
93 2003), the recessive nature of OXA resistance allows the persistence of these alleles, because  
94 alleles encoding non-functional enzyme are not counter-selected as long as they segregate with  
95 alleles encoding a functional enzyme. We collected miracidia larval stages from a village in  
96 Minas Gerais, Brazil, and sequenced the *SmSULT-OR* gene in these samples. We sought to  
97 answer several questions: How common are resistance alleles? How many times have OXA  
98 resistance alleles arisen? Are the OXA resistance alleles selected in the laboratory and identified  
99 using linkage mapping actually present in nature? More broadly, our goal is to better  
100 understand the evolution of drug resistance in schistosomes and to demonstrate the utility of  
101 molecular screening approaches in anticipation that the gene(s) underlying PZQ resistance will  
102 soon be identified.

103

## 104 **2. Materials and methods**

### 105 *2.1. Ethics statement*

106 Stool samples were collected in accordance to the procedures of the Research Ethics  
107 Committee of the Universidade Federal de São Paulo, Brazil (process number CAAE:  
108 15567313.8.0000.5091). The purpose of the study and the procedures to be followed were  
109 explained and written informed consent was obtained from all participants or their legal  
110 guardians prior to any collection.

111

### 112 *2.2. Sampling of Schistosoma mansoni miracidia*

113 We collected stools from school children from Ponto dos Volantes (Minas Gerais, Brazil,  
114 GPS coordinates: 16°45'3.301" S, 41°30'13.755" W) and shipped these at 4°C by ground  
115 transportation overnight to the Universidade Federal de Minas Gerais in Belo Horizonte, Brazil.  
116 We processed samples as follows: several grams of stools were filtered through three layers of  
117 sieves (mesh size: 250 to 45 µm) to obtain schistosome eggs. Eggs were transferred from the third

118 sieve grid to a Petri dish and exposed under artificial light for at least 1 h. All filtering steps and  
119 egg transfer were performed with locally available bottled mineral water.

120 Washed eggs were observed under a stereomicroscope. For each patient, 1 - 11 living  
121 miracidia were sampled individually in ~2  $\mu$ L of water and spotted onto CloneSaver FTA cards  
122 (GE Healthcare Life Sciences, USA). Spotted samples can be easily located on the cards because  
123 the pink dye on the cards turns white after water contact. Full cards were allowed to dry for 1 h  
124 at room temperature on the bench before being stored in a plastic bag and finally shipped to  
125 San Antonio, Texas, USA.

126

### 127 *2.3. Preparation of FTA samples for whole genome amplification (WGA)*

128 For each sample, we removed a 2 mm diameter disc from the FTA card using a 2 mm  
129 Harris Micro-punch (GE Healthcare Life Sciences). The 2 mm disc corresponds to the entire spot  
130 containing the whole miracidium. Each punch was placed individually in a 1.5 mL sterile tube.  
131 Punches were washed three times with FTA Purification Reagent (GE Healthcare Life Sciences)  
132 then rinsed twice with TE<sup>-1</sup> buffer (10 mM Tris, 0.1 mM EDTA, pH 8). Washing and rinsing steps  
133 were performed by adding 200  $\mu$ L of solution to each tube followed by 5 min of incubation on a  
134 nutating mixer (24 RPM) at room temperature and then discarding the solution while  
135 minimizing contact between the pipette tip and the punch. Punches were finally dried in tubes  
136 for 10 min at 56°C on a dry bath incubator.

137

### 138 *2.4. WGA*

139 We performed WGA on each punch using the illustra GenomiPhi V2 DNA Amplification  
140 kit (GE Healthcare Life Sciences). Punches were transferred in 0.2 mL sterile tubes using a sterile  
141 tip. We performed reactions following the manufacturer's instructions, immersing each punch  
142 in 9  $\mu$ L of sample buffer and keeping tubes on ice at all times after the denaturation step. After  
143 amplification, we quantified DNA using the Qubit dsDNA BR assay (Invitrogen, USA).

144

### 145 *2.5. Sequencing of SmSULT-OR exons*

146 The two exons of the *SmSULT-OR* gene were amplified and sequenced independently.  
147 Each PCR was performed using the TaKaRa Taq kit (Clontech, USA) and composed of 9.325  $\mu$ L of  
148 sterile water, 1.5  $\mu$ L of 10 $\times$  buffer, 1.2  $\mu$ L of dNTP (2.5 mM each), 0.9  $\mu$ L of MgCl<sub>2</sub> (25 mM),  
149 0.5  $\mu$ L of each primer (10  $\mu$ M; Table 1), 0.075  $\mu$ L of Taq polymerase (5 U. $\mu$ L<sup>-1</sup>) and 1  $\mu$ L of DNA

150 template. Amplifications were done using a GeneAmp PCR system 9700 thermocycler (Applied  
151 Biosystems, USA) with the following program: 95°C for 5 min; 95°C for 30 s, 60°C for 30 s, 72°C  
152 for 45 s, for 35 cycles; then 72°C for 10 min.

153 Exon 1 required a nested PCR in order to obtain a specific product. Products from the  
154 first PCR were cleaned up by adding 4 µL of ExoSAP-IT (Affymetrix USB products, USA). Tubes  
155 were then incubated at 37°C for 30 min and at 80°C for 15 min using a thermocycler. Cleaned  
156 PCR products were then used as templates for the second PCR following the above protocol.

157 Sequencing reactions were performed using a BigDye® Terminator v3.1 cycle sequencing  
158 kit (Applied Biosystems) on final PCR products. PCR products were cleaned up using ExoSAP-IT  
159 as described above. Sequencing reactions were performed using 2.59 µL of sterile water, 1 µL  
160 of 5× running buffer, 0.25 µL of BigDye Terminator ready reaction mix (Applied Biosystems),  
161 0.16 µL of forward or reverse primer used in the final PCR step, and 1 µL of final PCR product.  
162 Sequencing fragments were generated using a GeneAmp PCR system 9700 thermocycler  
163 (Applied Biosystems) with the following program: 96°C for 1 min; 96°C for 10 s, 50°C for 5 s,  
164 60°C for 4 min, for 25 cycles. Sequencing reactions were cleaned up using a BigDye  
165 XTerminator® purification kit (Applied Biosystems). In each reaction, 20.45 µL of SAM™ solution  
166 and 4.55 µL of XTerminator™ solution were added. Reactions were then vortexed for 30 min  
167 and run on a 3730xl DNA Analyzer (Applied Biosystems).

168 Sequencing files were first screened using FinchTV (v1.4.0; Geospiza Inc.) to identify  
169 failed sequencing reactions. In the case of failure, sequencing reactions were performed a  
170 second time.

171

## 172 *2.6. Variant identification and functional impact evaluation*

173 We scored variants using PolyPhred software (v6.18) (Nickerson et al., 1997) which  
174 relies on Phred (v0.020425.c), Phrap (v0.990319), and Consed (v29.0) software, analyzing each  
175 exon independently. We identified single nucleotide polymorphisms using a minimum phred  
176 quality score (-q) of 40, a minimum genotype score (-score) of 90, and a reference sequence  
177 that includes the *SmSULT-OR* gene and surrounding regions (position 1519500 to 1525200 of  
178 chromosome 6 of *S. mansoni* reference genome v5.0,  
179 [ftp://ftp.sanger.ac.uk/pub/pathogens/Schistosoma/mansoni/genome/Assembly-  
180 v5/sma\\_v5.0.chr.fa.gz](ftp://ftp.sanger.ac.uk/pub/pathogens/Schistosoma/mansoni/genome/Assembly-v5/sma_v5.0.chr.fa.gz)). Variant sites were labeled as non-reference alleles if they differed from  
181 the reference sequence. We identified Insertion/deletion (indel) polymorphisms using a  
182 minimum phred quality score (-q) of 40, a minimum genotype score (-iscore) of 80.  
183 Polymorphisms were visually validated using Consed. All the sequences were submitted to  
184 GenBank (GenBank accession no **KU951903-KU952091**).

185 Nucleic sequences showing mutations were translated in silico into protein sequences  
186 using the Translate tool from ExpASy portal (Artimo et al., 2012).

187 We evaluated the potential functional impact of identified polymorphisms on RNA  
188 features and on protein structure in silico. Modifications of RNA motifs and sites were analyzed  
189 using the RegRNA2.0 website (Chang et al., 2013) for all available features with *Drosophila*  
190 *melanogaster* as the reference species when required. Modifications in protein structure were  
191 assessed using the mutagenesis function of PyMol software (v1.7.2.0, Schrödinger, LLC) using  
192 the structure of *SmSULT-OR* determined previously (PDB code 4MUB, Valentim et al., 2013).

## 193 194 2.7. Population genetics analysis

195 We evaluated population structure by testing for Hardy-Weinberg equilibrium,  
196 measuring fixation indices ( $F_{st}$  and the  $F_{is}$ ) of parasites using Genepop (Rousset, 2008) with  
197 default options and considering schistosomes from a given patient as belonging to the same  
198 population. To identify positive selection, we calculated the number of synonymous (s) and  
199 non-synonymous (n) sites (Nei and Gojobori, 1986) and compared these values to synonymous  
200 (S) and non-synonymous (N) changes. We also performed a McDonald-Kreitman (MKT) test  
201 using the MKT server (<http://mkt.uab.es>; Egea et al., 2008). The *SmSULT-OR* homolog sequence  
202 in *Schistosoma rodhaini* was used as an outgroup and was obtained using tblastx from the NCBI  
203 server (Coordinators, 2015) on the *S. rodhaini* genome assembly (GenBank accession no.  
204 **GCA\_000951475.1**) using the *SmSULT-OR* sequence (GenBank accession no. **KF733459.1**) as a  
205 query.

## 206 207 2.8. Recombinant *SmSULT-OR* protein production

208 The *SmSULT-OR* sequence from the reference genome (Smp\_089320; GenBank  
209 accession no. **HE601629.1**) was used to create a codon optimized synthetic gene (GenScript)  
210 which was subcloned into the pAG8H vector derived from pKM260 (Melcher, 2000). We  
211 introduced mutations using a Phusion site-directed mutagenesis protocol (ThermoFisher  
212 Scientific, USA). Transformed *Escherichia coli* strain BL21 pLysS (Promega) were grown at 37°C  
213 until the absorbance ( $\lambda = 600$  nm) reached 0.7. We then decreased the temperature to 18°C  
214 and induced expression by the addition of isopropyl- $\beta$ -D-thiogalactoside (IPTG) at a final  
215 concentration of 1 mM. The cells were washed and resuspended in 50 mL of 50 mM Tris pH 8.0,  
216 500 mM NaCl (column buffer) containing 250  $\mu$ L of Sigma protease inhibitor cocktail per liter of  
217 culture and lysed by sonication on ice. The clarified supernatant was loaded onto a Ni<sup>2+</sup>-NTA  
218 affinity chromatography column (GE Healthcare), washed with five volumes of column buffer,



219 and eluted using a 10-500 mM imidazole gradient. We pooled fractions identified as the  
220 Smp\_089320 via SDS-PAGE and added His-tagged Tobacco etch virus (TEV) protease at a  
221 Smp\_089320:protease ratio of 15:1. The resulting solution was dialyzed overnight at 4°C  
222 against 50 mM Tris pH 8.0, 100 mM NaCl, 2 mM dithiothreitol (DTT). We passed the dialysate  
223 over the Ni<sup>2+</sup>-NTA column again to remove the His tag and the His-tagged TEV protease, while  
224 the cleaved target protein flowed through. The sample was loaded onto a GE-pre-packed Q  
225 anion exchange column and eluted with a 0.1-1.0 M NaCl gradient. We pooled fractions  
226 containing Smp\_089320 as identified by SDS-PAGE and dialyzed overnight at 4°C against 25 mM  
227 Tris pH 8.5, 50 mM NaCl, 2 mM reducing agent tris-(carboxyethyl)-phosphine (TCEP) to prevent  
228 formation of intermolecular disulfide bonds. The product was ~98% pure as estimated by SDS-  
229 PAGE. We concentrated the purified Smp\_089320 protein to 10 mg.mL<sup>-1</sup> using the calculated  
230 extinction coefficient  $\epsilon = 39,880 \text{ mol}^{-1}.\text{cm}^{-1}$ .

231

## 232 2.9. OXA activation assay

233 This assay utilizes the fact that OXA is a prodrug that is enzymatically converted into a  
234 highly reactive molecule that covalently binds intracellular components such as DNA (Pica-  
235 Mattoccia et al., 1989). Because the original assay employs worm extracts which require time  
236 for preparation and introduce unpredictable variations in SmSULT-OR concentration (Pica-  
237 Mattoccia et al., 1992a; Valentim et al., 2013), we developed an improved in vitro assay that  
238 uses purified recombinant SmSULT-OR enzyme. This in vitro assay measures the enzymatic  
239 sulfonation of tritiated OXA molecules which then bind genomic DNA (gDNA). The resultant  
240 radioactive DNA-OXA complexes can then be quantified by a scintillation counter. Enzymes  
241 produced by non-functional *SmSULT-OR* alleles cannot sulfonate OXA, so no DNA-OXA  
242 complexes are formed.

243 Recombinant proteins were expressed and purified commercially by GenScript, USA  
244 (p.C35R, p.P67L, p.E142del; Valentim et al., 2013) or by the Hart laboratory (University of Texas  
245 Health Science Center, USA) (p.G206V and p.N215Y). To determine which recombinant protein  
246 has the ability to activate OXA, 1 nM from each recombinant protein was added to 90  $\mu\text{L}$  of a  
247 protease inhibitor cocktail (PIC) consisting of 0.1 M HEPES pH 7.4, 0.1mM leupeptin, 2  $\mu\text{M}$  E-64,  
248 2  $\mu\text{M}$  pepstatin A, 0.1 U of aprotinin, and 10  $\text{ng}.\mu\text{L}^{-1}$  sheared *S. mansoni* gDNA as a final target.  
249 For each reaction 100  $\mu\text{Ci}$  of <sup>3</sup>H-OXA (Pica-Mattoccia et al., 1989) was solubilized in 2  $\mu\text{L}$  of  
250 DMSO and added to 10  $\mu\text{L}$  of a mixture containing the enzyme cofactors ATP and MgCl<sub>2</sub> at  
251 50 mM each, and 3'-phosphoadenosine-5'-phosphosulfate (PAPS) at 1 mM. The radiolabeled  
252 OXA and co-factor mix was then added to the PIC mix containing the recombinant protein. The  
253 resulting reaction was incubated for 2.5 h at 37°C and stopped by adding three volumes of 0.1%  
254 SDS in 0.1 M sodium bicarbonate. The reaction was then extracted three times with two

255 volumes of dichloromethane and the aqueous phase was counted in a liquid scintillation  
256 spectrometer (Beckman LS 6500 Scintillation Counter, USA) for 10 min. We also measured a  
257 blank solution (water) and the background scintillation. Blank and background values were  
258 subtracted from sample values. We performed three independent reactions for each  
259 recombinant protein.

260

## 261 *2.10. Statistical analysis*

262 Statistical analyses were done using R (v3.1.3) (R Core Team, 2015). For synonymous  
263 and non-synonymous changes, data were compared using a Fisher's exact test. For the OXA  
264 activation assay, the data were compared with a Welch t-test after testing for normality  
265 (Shapiro test,  $P > 0.05$ ).

266

## 267 **3. Results**

### 268 *3.1. Brazilian samples*

269 We collected 232 FTA preserved miracidium samples from 51 patients (range: 1-12,  
270 mean±S.D.: 4.55±3.65). We successfully amplified DNA from 204 samples (87.93%) from 50  
271 patients (range: 1-11, mean±S.D.: 4.08±3.26). Among the amplified samples, 189 from 49  
272 patients (range: 1-11, mean±S.D.: 3.86±3.18) contained schistosome DNA (92.65% of amplified  
273 samples, 81.47% of total samples). Among the 189 samples, we sequenced exon 1 from 183  
274 samples and exon 2 from 188 samples. All samples had at least one exon sequenced  
275 (Supplementary Table S1).

276

### 277 *3.2. SmSULT-OR variants in a Brazilian schistosome population*

278 We scored nine mutations: four non-synonymous single nucleotide polymorphisms  
279 (SNPs), one insertion and one deletion in the coding region, and three non-coding SNPs (Table  
280 2, Supplementary Table S1). The number of mutations in each exon (three in exon 1 and three  
281 in exon 2) did not differ regarding the length of the exon (327 bp and 447 bp, respectively)  
282 (Fisher's exact test,  $P = 0.7$ ).

283 Among the seven SNPs, five (71.43%) were transitions and two (28.57%) were  
284 transversions. Four of the SNPs were located in the exonic region, two in exon 1 and two in  
285 exon 2. Three were present at very low frequency (0.0027-0.0053) while one was present at  
286 very high frequency (0.95). One SNP was identified at the first position of the intron at a low

287 frequency (0.0056). The two remaining SNPs were found in the 3' untranslated region (UTR),  
288 one at high frequency (0.96), and one at low frequency (0.03).

289 One insertion was identified in exon 1 while one deletion was identified in exon 2, both  
290 at very low frequency (0.0027 and 0.0080, respectively).

291 Low frequency mutations were found in heterozygous or in homozygous states among  
292 the samples. Observing rare SNPs present as homozygotes was surprising, suggesting  
293 population structure. The test for Hardy-Weinberg equilibrium showed a global deficit in  
294 heterozygosity ( $P < 0.0001$ ). This is likely due to a deficit of heterozygous genotypes within host  
295 ( $F_{is} = 0.3251$ ) rather than due to population differentiation between infections ( $F_{st} = 0.0153$ ).  
296 Null alleles are not likely to explain the deficit. While we had small numbers of samples for  
297 which WGA failed, *SmSULT-OR* was successfully amplified from all samples for which WGA was  
298 successful.

299 Due to the absence of the synonymous mutations which precludes dN/dS calculation,  
300 we compared synonymous (S) and non-synonymous (N) changes with synonymous (s) and non-  
301 synonymous (n) sites to evaluate evidence for selection on *SmSULT-OR*. This comparison  
302 reveals no differences (Fisher's exact test,  $P = 1$ ) indicating that there was no evidence for  
303 selection. We also tested directional evolution by performing a McDonald-Kreitman test using  
304 the homolog sequence of *SmSULT-OR* from *S. rodhaini* as an outgroup. We found no evidence  
305 for directional evolution ( $\chi^2 = 1.466$ ,  $P = 0.225$ ).

306

### 307 *3.3. Functional impacts of mutations*

#### 308 *3.3.1. Non-coding variants*

309 We evaluated the functional impacts of the polymorphisms identified based on RNA  
310 features such as binding sites or splicing or regulatory motifs (Table 2). The mutation g.649G>A  
311 was predicted to modify the unique splice donor site at the end of exon 1. The disruption of the  
312 splicing site leads to translation of the beginning of the intron which ends four codons later due  
313 to the introduction of a stop codon. This results in a truncated protein with no active site (Fig. 1,  
314 Supplementary Movie S1). Mutations present on the 3' UTR were not predicted to be in any  
315 regulatory sites.

#### 316 *3.3.2. Coding variants*

317 All SNPs identified in the coding sequence of the gene were non-synonymous, and  
318 derived mutations relative to the outgroup *S. rodhaini* (Table 2). c.103T>C induced a  
319 substitution of cysteine to arginine (p.C35R) leading to a misfolded protein as shown previously

320 (Valentim et al., 2013) (Fig. 1). c.200C>T induced a substitution of proline to leucine (p.P67L)  
321 and was previously found in the OXA-sensitive strain (Valentim et al., 2013) (Fig. 1); this  
322 mutation therefore does not reduce enzyme activity. c.617G>T induced a substitution of glycine  
323 to valine (p.G206V) which occurs close the binding site of the PAPS co-factor and was previously  
324 observed in field-collected OXA-resistant strain (Valentim et al., 2013) but was never tested .  
325 We postulated that this mutation may have a potential detrimental effect on co-factor binding  
326 and finally enzyme activity (Fig. 1, Supplementary Movie S1). The mutation c.643A>T induced a  
327 substitution of asparagine to tyrosine (p.N215Y) which occurs on a helix connected to a loop  
328 involved in co-factor binding. This mutation is predicted to have little impact on protein  
329 structure. We therefore postulated that this will not change protein function (Fig. 1,  
330 Supplementary Movie S1).

### 331 3.3.3. *Indels*

332 Both indels have detrimental effects on the enzyme (Table 2). The insertion  
333 c.214\_125insA induces a frame shift leading to an early stop codon six codons after the  
334 mutation. This frame shift is predicted to produce a truncated enzyme with no active site. The  
335 deletion c.424\_426delGAA is known from previous functional analyses (Valentim et al., 2013) to  
336 disrupt OXA binding.

337

### 338 3.4. *OXA activation assay*

339 We produced two recombinant SmSULT-OR enzymes carrying the mutations p.G206V  
340 and p.N215Y in order to experimentally test whether these two mutations impact OXA  
341 activation, resulting in OXA resistance. We also tested known resistance alleles (p.C35R and  
342 p.E142del) as controls. The newly identified alleles are able to activate OXA as well as the  
343 reference allele (wild type) which does not carry any of these mutations (Welch t-test,  $t < -1.55$ ,  
344  $P > 0.18$ ) while the known resistance alleles showed no activation as expected (Welch t-test,  $t >$   
345  $5.58$ ,  $P < 0.021$ ) (Fig. 2). Therefore the two mutations tested (p.G206V and p.N215Y) did not  
346 disrupt co-factor binding or otherwise interfere with enzymatic activity.

347

## 348 4. Discussion

349 *SmSULT-OR* sequences from 189 miracidia collected from 49 Brazilian patients revealed  
350 nine mutations, including both mutations previously implicated in OXA resistance (Valentim et  
351 al., 2013). We found the p.C35R mutation, previously identified in the MAP strain. MAP was  
352 sampled from a patient living in a city of São Paulo state, Brazil (Supplementary Fig. S1) (Pica-  
353 Mattoccia et al., 1992b), the neighboring state of that from which our samples were collected.  
354 This suggests that the allele has been segregating in Brazilian parasite populations for more

355 than 25 years. The second variant identified in the field, p.E142del, was previously found in the  
356 HR laboratory strain, which was initially sampled from a Puerto-Rican patient and subsequently  
357 selected with hycanthone in the laboratory (Supplementary Fig. S1) (Cioli and Pica-Mattocchia,  
358 1984). This mutation could have arisen spontaneously in the laboratory. However, given that  
359 laboratory schistosome lines are maintained as outbred populations, the simplest explanation is  
360 that this mutation was segregating within the parasite population originally established in the  
361 laboratory. That we located this same deletion in two miracidia from Brazil and a parasite line  
362 collected from Puerto-Rico suggests that this allele may be widespread in schistosome  
363 populations from the New World.

364 It is not clear from our data whether the p.E142del seen in HR and Brazilian field  
365 samples arose independently or has a single origin. The HR p.E142del is found together with  
366 another mutation (p.L256W) (Valentim et al., 2013), which is absent from the p.E142del allele  
367 found in the Brazilian miracidia, providing some evidence for independent origins. Similarly,  
368 MAP differs from the Brazilian miracidia carrying the p.C35R mutation; while both also carry  
369 p.P67L, MAP carries an additional p.G206V mutation. Additional flanking SNP data will be  
370 required to critically test whether the p.E142del and p.C35R OXA resistance mutations have  
371 arisen a single time, or have multiple independent origins.

372 Laboratory selection is commonly used to explore the genetics of pathogen resistance,  
373 but a concern with this approach is that the mutations selected in the laboratory may poorly  
374 represent those occurring in nature. That we identified the same mutations in laboratory and  
375 field selected parasites is extremely encouraging, because ongoing work to identify mutations  
376 involved in PZQ resistance also utilizes laboratory selected parasites (Couto et al., 2011). We  
377 note that laboratory selection experiments with *Plasmodium* also tend to identify the same  
378 genes and often the same mutations that are observed in the field (Anderson et al., 2011),  
379 further validating this approach.

380 Besides the two known alleles, two of these new mutations, c.214\_215insA and  
381 g.328G>A, are predicted to confer OXA resistance; both introduce premature insertion of a stop  
382 codon producing a protein without an active site. These mutations therefore add two additional  
383 loss-of-function mutations that were probably selected during the OXA treatment. That four  
384 independent mutations are found in a single sampled parasite population is remarkable.  
385 Multiple origins have previously been observed in the evolution of resistance to benzimidazole  
386 drugs in the gastrointestinal nematode *Haemonchus* (Redman et al., 2015). The number of  
387 origins of resistance alleles is expected to depend on the size of the parasite population and the  
388 rate at which mutation generates resistant alleles (Messer and Petrov, 2013). In the case of  
389 *Haemonchus contortus*, the enormous size of parasite populations is likely to be the main  
390 driver, as only several specific mutations within  $\beta$ -tubulin can confer resistance. In the case of

391 OXA resistance, a high mutation rate may be expected as the main driver, because multiple  
392 different mutations within *SmSULT-OR* can generate non-functional proteins. It is also possible  
393 that OXA-resistant alleles were present within Brazilian *S. mansoni* populations prior to  
394 hycanthone or OXA treatment. Such standing variation may even have been present prior to  
395 the introduction of *S. mansoni* into South America. Analysis of *SmSULT-OR* in African  
396 populations, where OXA was not used extensively, will help answer this question.

397 Work on OXA resistance is simplified because we have an effective in vitro functional  
398 assay for screening allelic variants. The assay we used is an improvement on those previously  
399 described (Pica-Mattocchia et al., 1992a; Valentim et al., 2013), because worm homogenates are  
400 replaced by recombinant SmSULT-OR proteins. We identified two additional exon 2  
401 substitutions (p.G206V, p.N215Y): Structural analyses suggested that one of these mutations  
402 (p.G206V) may disrupt OXA activation, by interfering with binding of the co-factor (PAPS), while  
403 the other (p.N215Y) is likely to have minimal impact on function. We were able to directly test  
404 these predictions by performing OXA activation assays. These assays demonstrated that neither  
405 mutation prevents OXA activation, allowing us to reject our prediction for p.G206V and confirm  
406 our prediction for p.N215Y. Hence, while structural studies are useful for formulating  
407 hypotheses about the consequences of mutations, functional assays are essential for critical  
408 testing of these hypotheses.

409 The two last mutations were found in the 3' UTR of the cDNA. In silico analysis, using  
410 predictions based on *Drosophila*, did not reveal regulatory sites in these regions, suggesting  
411 that these mutations do not impact function. However, *Drosophila* may be a poor model to use.  
412 When more information on *SmSULT-OR* regulatory regions become available, new analyses of  
413 these two mutations may reveal potential effects on mRNA stability or translation rate.

414 The allele frequency of all four OXA resistance alleles combined is 3.8%, and only two  
415 parasites of 183 sampled (1%) are homozygous and therefore expected to be phenotypically  
416 resistant. The low frequency of the OXA resistance alleles can be explained by two non-  
417 exclusive hypotheses. First, resistance alleles may have remained at low levels even when OXA  
418 was the first line drug in Brazil. Second, fitness costs associated with these alleles may have  
419 driven reductions in allele frequency after the abandonment of OXA treatment. However OXA  
420 resistance alleles still persist within the populations in a heterozygous state, the cost being  
421 present only when worms are homozygous for the defective alleles.

422 Whether there is a cost associated with OXA resistance is questionable because  
423 miracidia homozygous for resistance alleles were found in the field in the present study. A  
424 previous study showed a reduction in infectivity and egg production in OXA-resistant parasites  
425 relative to the OXA-susceptible populations from which they were isolated (Cioli et al., 1992).  
426 However, this study suffers from a methodological limitation, because resistant and susceptible

427 laboratory populations had different genetic backgrounds, complicating interpretation.  
428 Comparison of isogenic wildtype and genetically manipulated resistant parasites, or analysis of  
429 fitness in the progeny of a genetic cross between OXA resistant and sensitive parasites would  
430 allow measurement of associated fitness costs, while minimizing confounding background  
431 effects.

432 New drugs are urgently needed for schistosome control because treatment currently  
433 relies on widespread monotherapy with PZQ. OXA is effective only against *S. mansoni*, but new  
434 OXA derivatives are under active development, with the aim of making compounds that are  
435 active against all three major schistosome species infecting humans (Taylor et al., 2015). If such  
436 derivatives are to be deployed clinically, understanding the capacity for resistance evolution in  
437 schistosome populations is of critical importance. For example, surveys of sequence variation in  
438 *SmSULT-OR* or the *S. haematobium* homologue would be an important prerequisite for field  
439 deployment of an OXA derivative active against both these species in Africa.

440 Our results have both positive and negative implications for field deployment of OXA  
441 derivatives. That multiple resistance alleles are present in a single parasite population suggests  
442 that resistance alleles may evolve and spread rapidly. On the positive side, existing resistance  
443 alleles are currently at extremely low frequency. It will be essential that OXA derivatives are  
444 deployed with appropriate partner drugs to minimize the rate of resistance evolution. We note  
445 that resistance to the antimalarial atovaquone was observed in the first clinical trial of this drug  
446 (Looareesuwan et al., 1996) and evolved de novo in different treated patients (Musset et al.,  
447 2007). Yet this drug is widely and effectively used with proguanil as a combination drug under  
448 the trade name Malarone.

449

## 450 **Acknowledgements**

451 This study was supported by NIH grants [R01-AI097576 (T.J.C.A.), 1R01AI115691 and  
452 P50 AI 098507 (P.T.L./P.J.H.)], World Health Organization [HQNTD1206356 (P.T.L.)], the  
453 UTHSCSA Presidents Collaborative Research Fund (P.T.L./P.J.H.) and the Robert A. Welch  
454 Foundation [AQ-1399 (P.J.H.)]. The molecular work at TBRI was conducted in facilities  
455 constructed with support from Research Facilities Improvement Program Grant (C06 RR013556)  
456 from the National Center for Research Resources (NIH). The AT&T Genomics Computing Center  
457 supercomputing facilities were supported by the AT&T Foundation and the National Center for  
458 Research Resources Grant (S10 RR029392). The *X-ray Crystallography Core Laboratory* is  
459 supported by the University of Texas Health Science Center, San Antonio, Office of the Vice  
460 President for Research and by the San Antonio Cancer Institute Grant (P30 CA054174). W.L was  
461 supported by a Cowles fellowship from Texas Biomedical Research Institute. N.E. was supported

462 by the City of San Antonio Summer Ambassador Program. R.R.A. received support from CNPq  
463 (168260/2014-0). G.O. received support from CNPq (309312/2012-4), CAPES (070/13, REDE  
464 21/2015) and FAPEMIG (RED-00014-14, PPM-00439-10). We thank Guilherme Oliveira, Dr.  
465 Fernanda Ludolf Ribeiro, Maycon Bruno and Nilvande Ferreira for technical assistance during  
466 stool processing and miracidia sampling, Dr. Andrea Gazzinelli and Dr. Leonardo Matoso for  
467 stool sampling at Ponto dos Volantes, Dr. Ricardo Toshio Fujiwara at Universidade Federal de  
468 Minas Gerais and Dr. Rodrigo Corrêa-Oliveira at Centro de Pesquisas René Rachou for providing  
469 laboratory space for stool processing and miracidia sampling, and Joanne Curran for use of a  
470 capillary sequencer.



- 472 Anderson, T., Nkhoma, S., Ecker, A., Fidock, D., 2011. How can we identify parasite genes that  
473 underlie antimalarial drug resistance? *Pharmacogenomics* 12, 59–85.  
474 doi:10.2217/pgs.10.165
- 475 Artimo, P., Jonnalagedda, M., Arnold, K., Baratin, D., Csardi, G., de Castro, E., Duvaud, S., Flegel,  
476 V., Fortier, A., Gasteiger, E., Grosdidier, A., Hernandez, C., Ioannidis, V., Kuznetsov, D.,  
477 Liechti, R., Moretti, S., Mostaguir, K., Redaschi, N., Rossier, G., Xenarios, I., Stockinger,  
478 H., 2012. ExpASY: SIB bioinformatics resource portal. *Nucleic Acids Res* 40, W597–W603.  
479 doi:10.1093/nar/gks400
- 480 Ashley, E.A., Dhorda, M., Fairhurst, R.M., Amaratunga, C., Lim, P., Suon, S., Sreng, S., Anderson,  
481 J.M., Mao, S., Sam, B., Sopha, C., Chuor, C.M., Nguon, C., Sovannaroeth, S.,  
482 Pukrittayakamee, S., Jittamala, P., Chotivanich, K., Chutasmit, K., Suchatsoonthorn, C.,  
483 Runchaoren, R., Hien, T.T., Thuy-Nhien, N.T., Thanh, N.V., Phu, N.H., Htut, Y., Han, K.-T.,  
484 Aye, K.H., Mokuolu, O.A., Olaosebikan, R.R., Folaranmi, O.O., Mayxay, M., Khanthavong,  
485 M., Hongvanthong, B., Newton, P.N., Onyamboko, M.A., Fanello, C.I., Tshefu, A.K.,  
486 Mishra, N., Valecha, N., Phyto, A.P., Nosten, F., Yi, P., Tripura, R., Borrmann, S.,  
487 Bashraheil, M., Peshu, J., Faiz, M.A., Ghose, A., Hossain, M.A., Samad, R., Rahman, M.R.,  
488 Hasan, M.M., Islam, A., Miotto, O., Amato, R., MacInnis, B., Stalker, J., Kwiatkowski, D.P.,  
489 Bozdech, Z., Jeeyapant, A., Cheah, P.Y., Sakulthaew, T., Chalk, J., Intharabut, B., Silamut,  
490 K., Lee, S.J., Vihokhern, B., Kunasol, C., Imwong, M., Tarning, J., Taylor, W.J., Yeung, S.,  
491 Woodrow, C.J., Flegg, J.A., Das, D., Smith, J., Venkatesan, M., Plowe, C.V., Stepniewska,  
492 K., Guerin, P.J., Dondorp, A.M., Day, N.P., White, N.J., Tracking Resistance to Artemisinin  
493 Collaboration (T. R. A. C), 2014. Spread of artemisinin resistance in *Plasmodium*  
494 *falciparum* malaria. *N Engl J Med* 371, 411–423.
- 495 Bhembe, N.L., Nwodo, U.U., Govender, S., Hayes, C., Ndip, R.N., Okoh, A.I., Green, E., 2014.  
496 Molecular detection and characterization of resistant genes in *Mycobacterium*  
497 *tuberculosis* complex from DNA isolated from tuberculosis patients in the Eastern Cape  
498 province South Africa. *BMC Infect Dis* 14, 479. doi:10.1186/1471-2334-14-479
- 499 Chang, T.-H., Huang, H.-Y., Hsu, J.B.-K., Weng, S.-L., Horng, J.-T., Huang, H.-D., 2013. An  
500 enhanced computational platform for investigating the roles of regulatory RNA and for  
501 identifying functional RNA motifs. *BMC Bioinformatics* 14 Suppl 2, S4. doi:10.1186/1471-  
502 2105-14-S2-S4
- 503 Chaudhry, U., Redman, E.M., Raman, M., Gilleard, J.S., 2015. Genetic evidence for the spread of  
504 a benzimidazole resistance mutation across southern India from a single origin in the  
505 parasitic nematode *Haemonchus contortus*. *Int J Parasitol* 45, 721–728.  
506 doi:10.1016/j.ijpara.2015.04.007
- 507 Cheetham, P.S.J., 1994. Case studies in applied biocatalysis from ideas to products, in: Cabral,  
508 J.M.S., Best, D., Boross, L., Tramper, J. (Eds.), *Applied Biocatalysis*. Harwood Academics  
509 Publishers GmbH, Chur, pp. 47–108.
- 510 Cioli, D., Pica-Mattocchia, L., 1984. Genetic analysis of hycanthon resistance in *Schistosoma*  
511 *mansoni*. *Am J Trop Med Hyg* 33, 80–88.

512 Cioli, D., Pica-Mattocchia, L., Moroni, R., 1992. *Schistosoma mansoni*: hycanthone/oxamniquine  
513 resistance is controlled by a single autosomal recessive gene. *Exp Parasitol* 75, 425–432.  
514 doi:10.1016/0014-4894(92)90255-9

515 Colley, D.G., Bustinduy, A.L., Secor, W.E., King, C.H., 2014. Human schistosomiasis. *Lancet* 383,  
516 2253–2264. doi:10.1016/S0140-6736(13)61949-2

517 Coordinators, N.R., 2015. Database resources of the National Center for Biotechnology  
518 Information. *Nucleic Acids Res* 43, D6–17. doi:10.1093/nar/gku1130

519 Coura, J.R., Amaral, R.S., 2004. Epidemiological and control aspects of schistosomiasis in  
520 Brazilian endemic areas. *Mem Inst Oswaldo Cruz* 99, 13–19. doi:10.1590/S0074-  
521 02762004000900003

522 Coura, J.R., Conceição, M.J., 2010. Specific schistosomiasis treatment as a strategy for disease  
523 control. *Mem Inst Oswaldo Cruz* 105, 598–603.

524 Couto, F.F.B., Coelho, P.M.Z., Araújo, N., Kusel, J.R., Katz, N., Jannotti-Passos, L.K., Mattos,  
525 A.C.A., 2011. *Schistosoma mansoni*: a method for inducing resistance to praziquantel  
526 using infected *Biomphalaria glabrata* snails. *Mem Inst Oswaldo Cruz* 106, 153–157.  
527 doi:dx.doi.org/10.1590/S0074-02762011000200006

528 Djègbè, I., Agossa, F.R., Jones, C.M., Poupardin, R., Cornelie, S., Akogbéto, M., Ranson, H.,  
529 Corbel, V., 2014. Molecular characterization of DDT resistance in *Anopheles gambiae*  
530 from Benin. *Parasit Vectors* 7, 409. doi:10.1186/1756-3305-7-409

531 Dye, C., Mertens, T., Hirschall, G., Mpanju-Shumbusho, W., Newman, R.D., Raviglione, M.C.,  
532 Savioli, L., Nakatani, H., 2013. WHO and the future of disease control programmes.  
533 *Lancet* 381, 413–418. doi:10.1016/S0140-6736(12)61812-1

534 Egea, R., Casillas, S., Barbadilla, A., 2008. Standard and generalized McDonald-Kreitman test: a  
535 website to detect selection by comparing different classes of DNA sites. *Nucleic Acids*  
536 *Res* 36, W157–W162. doi:10.1093/nar/gkn337

537 Essandoh, J., Yawson, A.E., Weetman, D., 2013. Acetylcholinesterase (Ace-1) target site  
538 mutation 119S is strongly diagnostic of carbamate and organophosphate resistance in  
539 *Anopheles gambiae* s.s. and *Anopheles coluzzii* across southern Ghana. *Malar J* 12, 404.  
540 doi:10.1186/1475-2875-12-404

541 Jansma, W.B., Rogers, S.H., Liu, C.L., Bueding, E., 1977. Experimentally produced resistance of  
542 *Schistosoma mansoni* to hycanthone. *Am J Trop Med Hyg* 26, 926–936.

543 Katz, N., Dias, E.P., Araújo, N., Souza, C.P., 1973. Estudo de uma cepa humana de *Schistosoma*  
544 *mansoni* resistente a agentes esquistossomicidas. *Rev Soc Bras Med Trop* 7, 381 – 387.  
545 doi:10.1590/S0037-86821973000600008

546 Katz, N., Pellegrino, J., Ferreira, M.T., Oliveira, C.A., Dias, C.B., 1968. Preliminary clinical trials  
547 with hycanthone, a new antischistosomal agent. *Am J Trop Med Hyg* 17, 743–746.

548 Katz, N., Pellegrino, J., Grinbaum, E., Chaves, A., Zicker, F., 1973. Preliminary clinical trials with  
549 oxamniquine, a new antischistosomal agent. *Rev Inst Med Trop Sao Paulo* 15, 25–29.

550 Looareesuwan, S., Viravan, C., Webster, H.K., Kyle, D.E., Hutchinson, D.B., Canfield, C.J., 1996.  
551 Clinical studies of atovaquone, alone or in combination with other antimalarial drugs,  
552 for treatment of acute uncomplicated malaria in Thailand. *Am J Trop Med Hyg* 54, 62–  
553 66.

554 Melcher, K., 2000. A modular set of prokaryotic and eukaryotic expression vectors. *Anal*  
555 *Biochem* 277, 109–120. doi:10.1006/abio.1999.4383

556 Messer, P.W., Petrov, D.A., 2013. Population genomics of rapid adaptation by soft selective  
557 sweeps. *Trends Ecol Evol* 28, 659–669. doi:10.1016/j.tree.2013.08.003

558 Musset, L., Le Bras, J., Clain, J., 2007. Parallel evolution of adaptive mutations in *Plasmodium*  
559 *falciparum* mitochondrial DNA during atovaquone-proguanil treatment. *Mol Biol Evol*  
560 24, 1582–1585. doi:10.1093/molbev/msm087

561 Nei, M., Gojobori, T., 1986. Simple methods for estimating the numbers of synonymous and  
562 nonsynonymous nucleotide substitutions. *Mol Biol Evol* 3, 418–426.

563 Nickerson, D.A., Tobe, V.O., Taylor, S.L., 1997. PolyPhred: automating the detection and  
564 genotyping of single nucleotide substitutions using fluorescence-based resequencing.  
565 *Nucleic Acids Res* 25, 2745–2751.

566 Ogino, S., Gulley, M.L., den Dunnen, J.T., Wilson, R.B., Association for Molecular Pathology  
567 Training, Committe, E., 2007. Standard mutation nomenclature in molecular  
568 diagnostics: practical and educational challenges. *J Mol Diagn* 9, 1–6.

569 Panichsillapakit, T., Smith, D.M., Wertheim, J.O., Richman, D.D., Little, S.J., Mehta, S.R., 2015.  
570 Prevalence of transmitted HIV drug resistance among recently infected persons in San  
571 Diego, California 1996–2013. *J Acquir Immune Defic Syndr*.  
572 doi:10.1097/QAI.0000000000000831

573 Pearce, R.J., Pota, H., Evehe, M.-S.B., B<sup>a</sup>, E.-H., Mombo-Ngoma, G., Malisa, A.L., Ord, R.,  
574 Inojosa, W., Matondo, A., Diallo, D.A., Mbacham, W., van den Broek, I.V., Swarthout,  
575 T.D., Getachew, A., Dejene, S., Grobusch, M.P., Njie, F., Dunyo, S., Kweku, M., Owusu-  
576 Agyei, S., Chandramohan, D., Bonnet, M., Guthmann, J.-P., Clarke, S., Barnes, K.I., Streat,  
577 E., Katokele, S.T., Uusiku, P., Agboghoroma, C.O., Elegba, O.Y., Cissé, B., A-Elbasit, I.E.,  
578 Giha, H.A., Kachur, S.P., Lynch, C., Rwakimari, J.B., Chanda, P., Hawela, M., Sharp, B.,  
579 Naidoo, I., Roper, C., 2009. Multiple origins and regional dispersal of resistant dhps in  
580 African *Plasmodium falciparum* malaria. *PLoS Med* 6, e1000055.  
581 doi:10.1371/journal.pmed.1000055

582 Pica-Mattoccia, L., Archer, S., Cioli, D., 1992a. Hycanthone resistance in schistosomes correlates  
583 with the lack of an enzymatic activity which produces the covalent binding of  
584 hycanthone to parasite macromolecules. *Mol Biochem Parasitol* 55, 167–175.  
585 doi:10.1016/0166-6851(92)90137-9

586 Pica-Mattoccia, L., Carlini, D., Guidi, A., Cimica, V., Vigorosi, F., Cioli, D., 2006. The schistosome  
587 enzyme that activates oxamniquine has the characteristics of a sulfotransferase. *Mem*  
588 *Inst Oswaldo Cruz* 101 Suppl 1, 307–312. doi:10.1590/S0074-02762006000900048

589 Pica-Mattoccia, L., Cioli, D., Archer, S., 1989. Binding of oxamniquine to the DNA of  
590 schistosomes. *Trans R Soc Trop Med Hyg* 83, 373–376. doi:10.1016/0035-  
591 9203(89)90508-7

592 Pica-Mattoccia, L., Dias, L.C., Cioli, D., 1992b. Genetic complementation analysis of two  
593 independently isolated hycanthone-resistant strains of *Schistosoma mansoni*. *Mem Inst*  
594 *Oswaldo Cruz* 87 Suppl 4, 211–214. doi:10.1590/S0074-02761992000800032

595 Pica-Mattoccia, L., Dias, L.C., Moroni, R., Cioli, D., 1993. *Schistosoma mansoni*: genetic  
596 complementation analysis shows that two independent hycanthone/oxamniquine-  
597 resistant strains are mutated in the same gene. *Exp Parasitol* 77, 445–449.  
598 doi:10.1006/expr.1993.1104

599 R Core Team, 2015. R: A Language and Environment for Statistical Computing. R Foundation for  
600 Statistical Computing, Vienna, Austria.

601 Redman, E., Whitelaw, F., Tait, A., Burgess, C., Bartley, Y., Skuce, P.J., Jackson, F., Gilleard, J.S.,  
602 2015. The emergence of resistance to the benzimidazole anthelmintics in parasitic  
603 nematodes of livestock is characterised by multiple independent hard and soft selective  
604 sweeps. *PLoS Negl Trop Dis* 9, e0003494. doi:10.1371/journal.pntd.0003494

605 Rousset, F., 2008. genepop'007: a complete re-implementation of the genepop software for  
606 Windows and Linux. *Mol Ecol Resour* 8, 103–106. doi:10.1111/j.1471-  
607 8286.2007.01931.x

608 Rufener, L., Mäser, P., Roditi, I., Kaminsky, R., 2009. *Haemonchus contortus* acetylcholine  
609 receptors of the DEG-3 subfamily and their role in sensitivity to monepantel. *PLoS*  
610 *Pathog* 5, e1000380. doi:10.1371/journal.ppat.1000380

611 Steinmann, P., Keiser, J., Bos, R., Tanner, M., Utzinger, J., 2006. Schistosomiasis and water  
612 resources development: systematic review, meta-analysis, and estimates of people at  
613 risk. *Lancet Infect Dis* 6, 411–425. doi:10.1016/S1473-3099(06)70521-7

614 Taylor, A.B., Pica-Mattocchia, L., Polcaro, C.M., Donati, E., Cao, X., Basso, A., Guidi, A., Rugel, A.R.,  
615 Holloway, S.P., Anderson, T.J.C., Hart, P.J., Cioli, D., LoVerde, P.T., 2015. Structural and  
616 functional characterization of the enantiomers of the antischistosomal drug  
617 oxamniquine. *PLoS Negl Trop Dis* 9, e0004132. doi:10.1371/journal.pntd.0004132

618 Utzinger, J., Keiser, J., Shuhua, X., Tanner, M., Singer, B.H., 2003. Combination chemotherapy of  
619 schistosomiasis in laboratory studies and clinical trials. *Antimicrob Agents Chemother*  
620 47, 1487–1495. doi:10.1128/AAC.47.5.1487-1495.2003

621 Valentim, C.L.L., Cioli, D., Chevalier, F.D., Cao, X., Taylor, A.B., Holloway, S.P., Pica-Mattocchia, L.,  
622 Guidi, A., Basso, A., Tsai, I.J., Berriman, M., Carvalho-Queiroz, C., Almeida, M., Aguilar,  
623 H., Frantz, D.E., Hart, P.J., LoVerde, P.T., Anderson, T.J.C., 2013. Genetic and molecular  
624 basis of drug resistance and species-specific drug action in Schistosome parasites.  
625 *Science* 342, 1385–1389. doi:10.1126/science.1243106

626

627

628 **Figures**

629

630 **Fig. 1.** Mapping of the mutations on the gene sequence and structure of *Schistosoma mansoni* SmSULT-  
631 OR sulfotransferase. Exon 1 and exon 2 are represented in orange and beige, respectively. Single  
632 nucleotide polymorphisms and insertion/deletion events are represented in cyan and magenta,  
633 respectively. Loss-of-function mutations are highlighted in black. (A) Linear representation of the  
634 *SmSULT-OR* gene showing the relative position of the mutations and their translation in amino acid  
635 sequences. (B) Positions of mutations on the SmSULT-OR protein. Oxamniquine (OXA) is represented in  
636 yellow, 3'-phosphoadenosine-5'-phosphosulfate (PAPS) co-factor is represented in green, and spatial  
637 distortions are represented by red discs. For a more detailed view of the mutations on the structure and  
638 their functional impact, see Supplementary Move S1.

639

640 **Fig. 2.** Enzymatic activity of recombinant *Schistosoma mansoni* SmSULT-OR sulfotransferase expressed  
641 from different allelic variants. This in vitro oxamniquine OXA activation assay quantifies DNA-OXA  
642 complexes by scintillation (counts per min) (see section 2.9). Bars show the mean of three replicates,  
643 while error bars are S.E.M. Enzyme carrying loss-of-function mutations, such as p.C35 or p.E142del,  
644 showed no OXA activation, while two newly identified alleles (p.G206V and p.N215Y) did not impair OXA  
645 activation. \*  $P < 0.05$ .

646

647 **Supplementary Fig. S1.** Map of South America showing the places of origin of known and new  
648 *Schistosoma mansoni* oxamniquine (OXA) resistance alleles. Mutation p.C35R was identified in São Paulo  
649 state (SP, Brazil) while p.E142del was identified in Puerto Rico (PR). Both locations are distant from our  
650 sample site in Minas Gerais state (MG, Brazil; ~500 km and ~3,000 km, respectively).

651

652 **Supplementary Movie S1.** Impact of mutations on *Schistosoma mansoni* SmSULT-OR sulfotransferase  
653 structure and function. This video details the mutations and potential impact on the protein structure  
654 and enzyme activity. OXA: oxamniquine, PAPS: 3'-phosphoadenosine-5'-phosphosulfate

655 **Reference**

656 Valentim, C.L.L., Cioli, D., Chevalier, F.D., Cao, X., Taylor, A.B., Holloway, S.P., Pica-Mattocchia, L.,  
657 Guidi, A., Basso, A., Tsai, I.J., Berriman, M., Carvalho-Queiroz, C., Almeida, M., Aguilar, H., Frantz, D.E.,  
658 Hart, P.J., LoVerde, P.T., Anderson, T.J.C., 2013. Genetic and molecular basis of drug resistance and  
659 species-specific drug action in schistosome parasites. *Science* 342, 1385–1389.  
660 doi:10.1126/science.1243106

661

662 **Table 1.** Primer sequences used for PCRs and sequencing of the two exons of the *Schistosoma mansoni* *SmSULT-OR* gene in this study.

|        | <b>Primer type</b>        | <b>Primer sequence (5' to 3' orientation)</b> | <b>Expected amplicon size (bp)</b> | <b>Usage</b>       |
|--------|---------------------------|-----------------------------------------------|------------------------------------|--------------------|
| Exon 1 | Outer forward primer      | GCGAGATTCAAACCCAGGAT                          | 822                                | PCR                |
|        | Outer reverse primer      | GCCGTGATATTACTATCAATCCC                       |                                    | PCR                |
|        | Nested forward primer     | GGGTAAAGGAAGAGGGTTGG                          | 545                                | PCR                |
|        | Nested reverse primer     | TAAGAACAGACATATTAGACGAGT                      |                                    | PCR and sequencing |
|        | Sequencing forward primer | TATATATGAAATATTATAACATTAC                     | -                                  | sequencing         |
| Exon 2 | Forward primer            | ACTTCAACCAATCCACAAATCC                        | 672                                | PCR and sequencing |
|        | Reverse primer            | AGTCCATTCATTCAATGTTTCAA                       |                                    | PCR and sequencing |

663

664

665 **Table 2.** Mutations scored in the exons, intron, and 3' untranslated regions (UTR) of the *Schistosoma mansoni* *SmSULT-OR* gene. For each  
666 mutation, the corresponding nucleotide found in *Schistosoma rodhaini*, the number of homozygous and heterozygous samples carrying the non-  
667 reference allele, the number of samples sequenced (sample size), the allele frequency of the non-reference allele, the corresponding amino acid  
668 mutation, and the functional impact are shown.

|        | Nucleic mutation | <i>Schistosoma rodhaini</i> state | No. of homozygous samples for non-reference allele | No. of heterozygous samples for non-reference allele | Sample size | Frequency of the non-reference allele | Amino acid mutation | Functional impact                                                        |
|--------|------------------|-----------------------------------|----------------------------------------------------|------------------------------------------------------|-------------|---------------------------------------|---------------------|--------------------------------------------------------------------------|
| Exon 1 | c.103T>C         | T                                 | 0                                                  | 1                                                    | 183         | 0.0027                                | p.C35R              | Misfolded protein (Valentim et al., 2013)                                |
|        | c.200C>T         | C                                 | 169                                                | 12                                                   | 183         | 0.9563                                | p.P67L              | No effect (Valentim et al., 2013)                                        |
|        | c.214_215insA    | -                                 | 0                                                  | 1                                                    | 183         | 0.0027                                | p.T72NfsX5          | Truncated protein with no active site                                    |
| Intron | g.328G>A         | G                                 | 1                                                  | 0                                                    | 179         | 0.0056                                | p.V110IfsX3         | Splicing site disrupted leading to truncated protein with no active site |
| Exon 2 | c.424_426delGAA  | -                                 | 1                                                  | 1                                                    | 188         | 0.0080                                | p.E142del           | Impaired oxamniquine binding (Valentim et al., 2013)                     |
|        | c.617G>T         | G                                 | 1                                                  | 0                                                    | 188         | 0.0053                                | p.G206V             | No effect (Fig. 2)                                                       |
|        | c.643A>T         | A                                 | 0                                                  | 1                                                    | 188         | 0.0027                                | p.N215Y             | No effect (Fig. 2)                                                       |
| 3'     | g.4720C>T        | C                                 | 177                                                | 9                                                    | 188         | 0.9654                                | -                   | -                                                                        |
| UTR    | g.4741T>C        | T                                 | 2                                                  | 8                                                    | 188         | 0.0319                                | -                   | -                                                                        |

669 The code used for nucleic mutations indicates the sequence type (c = coding, g = gene), the position, and the mutation type (X>Y = substitution  
670 of X by Y, insN = insertion of N, delN = deletion of N). The code used for protein mutations indicates the sequence type (p = protein), the  
671 reference amino acid, the position, and finally the alternative amino acid, and when frame shift (fs) occurs, the position of the stop codon (X)  
672 after the mutation. For details about the nomenclature, see Ogino et al., 2007.  
673



**Figure 1**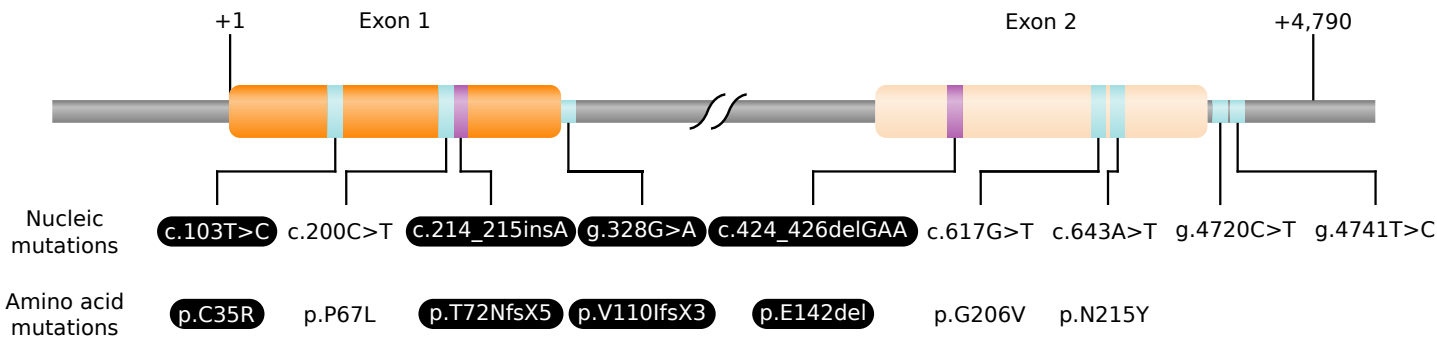**B**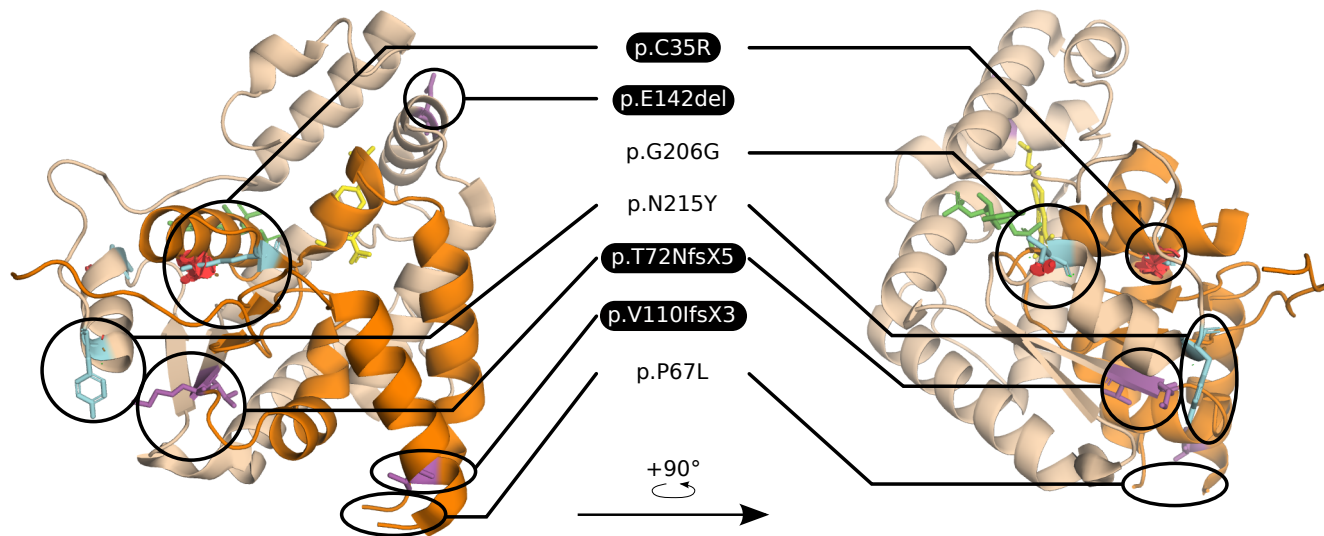

**Figure 2**

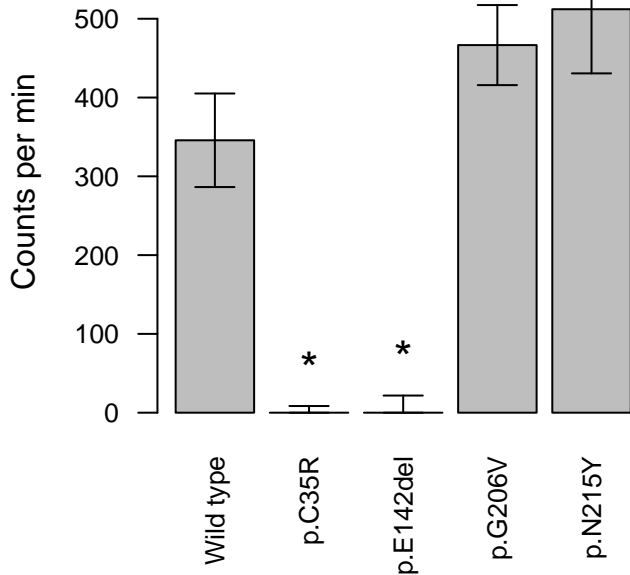

**Supplementary Table S1**

[Click here to download Multi-media supplement: IJPara15\\_SI04\\_R1\\_SuppTable\\_S1\\_edited\\_FC.xlsx](#)

**Supplementary Fig. S1**

[Click here to download Multi-media supplement: Supp. fig. 1.pdf](#)

**Supplementary Movie S1**

[Click here to download Multi-media supplement: Movie S1 - SmSULT\\_movie.mp4](#)
