# Supplementary material
Source: PubMed Central journal article supplement (PMC4909573)

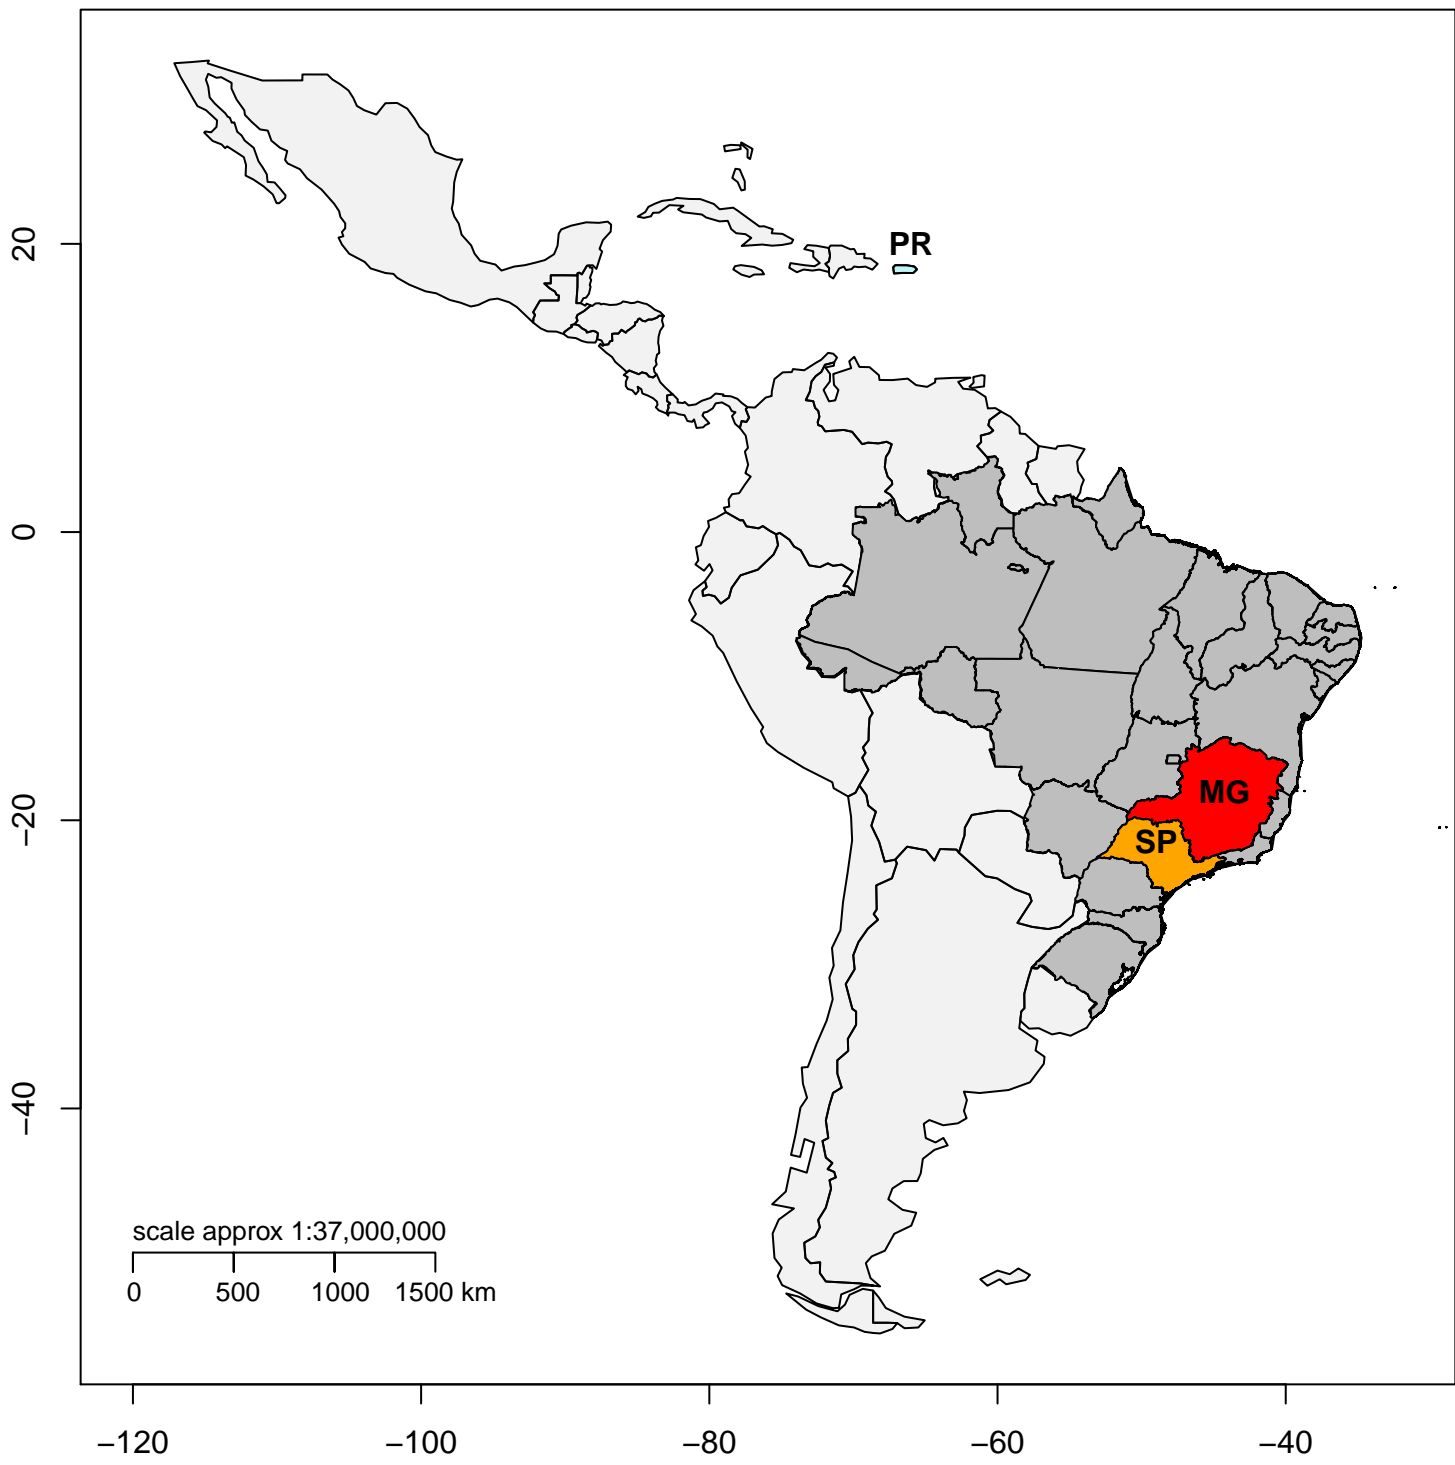

Supplement: NIHMS776861-supplement-4.pdf [file NIHMS776861-supplement-4.pdf]
